# Supplementary material
Source: PubMed Central journal article supplement (PMC6336483)
Supplement: supp_7.1.E8_2018-0091-original-submission.pdf [file supp_7.1.E8_2018-0091-original-submission.pdf]

1  
2  
3 1 Title: The organization of primary health care services for those with chronic disease across  
4 2 Newfoundland and Labrador: a descriptive analysis of publicly funded service provision

5  
6 3 Buote, R. BSc, MSc<sup>1</sup>, Asghari, S. MD, PhD<sup>2, 3</sup>, Aubrey-Bassler, K. MSc, MD<sup>2, 4</sup>, Knight, J.C. PhD<sup>1, 4, 5</sup>,  
7 4 Lukewich, J. RN, PhD<sup>1, 6</sup>

8  
9 5 <sup>1</sup> Division of Community Health and Humanities, Memorial University of Newfoundland, St. John's,  
10 6 NL, Canada

11  
12 7 <sup>2</sup> Discipline of Family Medicine, Memorial University of Newfoundland, St. John's, NL, Canada

13  
14 8 <sup>3</sup> Center for Rural Health Studies, St. John's, NL, Canada

15  
16 9 <sup>4</sup> Primary Healthcare Research Unit, Faculty of Medicine, Memorial University of Newfoundland, St.  
17 10 John's, NL, Canada

18  
19 11 <sup>5</sup> Health Analytics and Information Services, Newfoundland and Labrador Centre for Health  
20 12 Information, St. John's, NL, Canada

21  
22 13 <sup>6</sup> School of Nursing, Memorial University of Newfoundland, St. John's, NL, Canada

23  
24 14 Corresponding author:

25  
26 15 Dr. Julia Lukewich

27  
28 16 jlukewich@mun.ca

29 17 School of Nursing

30 18 Memorial University of Newfoundland

31 19 300 Prince Philip Dr.

32 20 St. John's, NL, Canada

33 21 A1B 3V6  
34  
35  
36 22  
37  
38 23  
39  
40 24  
41  
42 25  
43  
44 26  
45  
46 27  
47  
48 28  
49  
50 29  
51  
52 30  
53  
54 31  
55  
56 32  
57  
58 33  
59  
60

## 1 ABSTRACT

2 **Background:** Newfoundland and Labrador has a rapidly aging population, poor health behaviours,  
3 high rates of chronic disease, and a rural population, presenting a unique challenge to health care  
4 delivery. The aim of this study is to describe the availability of publicly funded primary health care  
5 programs and services delivered by regional health authorities across the province.

6 **Methods:** A descriptive analysis was performed on a cross-sectional provincial primary health care  
7 survey. Survey data included location of site, disease-specific chronic disease prevention programming,  
8 types of routine primary care, allied health prevention and promotion, chronic disease prevention and  
9 management services, and team-based care. Mode of service delivery was identified for most programs  
10 and services.

11 **Results:** Surveys were returned by 153 sites (99.4% response rate). Family physician services were  
12 available at 66% (n=145) and nurse practitioner at 51% (n=144) of sites. Generally, many sites offered  
13 screening for cervical (59.7%, n=144), colon (41.5%, n=142), and prostate cancers (42.6%, n=141),  
14 and various self-management and education services. Allied health services, such as clinical nutritional  
15 counselling (46.6%, n=146) and occupational therapy (46.3%, n=147) were frequently available.  
16 Available health care services were most often offered by on-site staff members, while few used  
17 telehealth. Overall, rural sites offered a greater variety of services, compared to urban.

18 **Interpretation:** There is considerable variability in the range of primary health care services available  
19 across Newfoundland and Labrador, with limited delivery of some primary health care programs and  
20 services. Future research should examine how availability of programs and services effects health  
21 outcomes and costs.

## 1 INTRODUCTION

2 It is well-established that health systems with a strong primary health care sector achieve better  
3 outcomes at lower cost (1). Primary health care is a critical component of quality health care delivery  
4 for people with chronic disease (2,3). For Canadians, the most prevalent conditions include diabetes,  
5 chronic obstructive pulmonary disease, ischemic heart disease, and cancer (4). It is estimated that  
6 approximately 29% of Canadians have at least one chronic disease and 7% have two or more (4).<sup>1</sup>  
7 Prevalence of chronic disease in Newfoundland and Labrador is higher than the national average; close  
8 to one third of the population has one or more chronic diseases and about 9% have two or more (4).  
9 This burden on the provincial health care system is further challenged by high health care use and  
10 hospitalization rates, and poor retention of primary health care providers, especially in rural and remote  
11 communities (5,6).

12 To address the increasing prevalence of and costs associated with chronic diseases, Canada's  
13 provinces and territories are reforming primary health care delivery and examining specific attributes  
14 of primary health care systems that support or hinder high-quality care (7). The goal of the provincial  
15 and territorial health care systems is to ensure patients have access to the care they need, when and  
16 where they need it (8,9). National studies have indicated inequities in care between urban and rural  
17 areas, with rural regions of the country reporting lower likelihood of accessing health care services,  
18 attributed to greater barriers accessing care (e.g., travel times, greater cost) (10,11). As a result,  
19 Canadians living in rural areas are more likely to report poorer health outcomes than their urban  
20 counterparts. Given that approximately 50% of people in Newfoundland and Labrador reside in a rural  
21 community (12), it is important to examine the primary health care attributes for populations living in

---

<sup>1</sup> One of five major chronic diseases, as identified by Canadian Community Health Survey (CCHS); cancer, diabetes, cardiovascular diseases (heart disease and/or stroke), chronic respiratory diseases (asthma and/or chronic obstructive pulmonary disease) and mood and anxiety disorders.

1  
2  
3 1 different geographical settings. Therefore, the aim of this study is to describe the availability of primary  
4  
5 2 health care programs and services provided by regional health authorities across Newfoundland and  
6  
7 3 Labrador. Specifically, the objectives of this study are:

8  
9 4 (1) To describe the availability of primary health care programs and services for chronic diseases  
10  
11 5 provided by regional health authorities across Newfoundland and Labrador, and

12  
13  
14 6 (2) To examine differences in the nature of programs and services for chronic diseases provided by  
15  
16 7 regional health authorities available in urban and rural regions of Newfoundland and Labrador.

## 18 8 **METHODS**

### 20 9 **Design**

21  
22  
23 10 This study is a descriptive analysis performed on a cross-sectional provincial primary health  
24  
25 11 care survey of publicly funded primary health care sites conducted by the Newfoundland and Labrador  
26  
27 12 Centre for Health Information.

### 29 13 **Setting**

30  
31  
32 14 Primary health care sites funded through regional health authorities in Newfoundland and  
33  
34 15 Labrador (i.e. Eastern Health, Central Health, Western Health, and Labrador-Grenfell Health)  
35  
36 16 identified by the Primary Health Care Review Working Group were surveyed (n=154). A primary  
37  
38 17 health care site was defined as any location that offered primary health care services (e.g. primary care,  
39  
40 18 community support centres, mental health care). This sample represents publicly funded primary health  
41  
42 19 care sites across the province. Privately funded sites, such as fee-for-service practices, are not  
43  
44 20 represented in these data (comprise approximately 65% of physicians in Newfoundland and Labrador)  
45  
46 21 (14).

### 48 22 **Source of Data**

49  
50  
51 23 This survey was administered by the Newfoundland and Labrador Centre for Health  
52  
53 24 Information, in partnership with the Department of Health and Community Services, Government of  
54  
55  
56  
57  
58  
59  
60

1  
2  
3 1 Newfoundland and Labrador. The goal of the survey was to identify primary health care services  
4  
5 2 offered across the province. To develop the questionnaire, a working group was established by the  
6  
7 3 Newfoundland and Labrador Centre for Health Information. This working group was chaired by an  
8  
9 4 employee of the Newfoundland and Labrador Centre for Health Information and consisted of two  
10  
11 5 members from each provincial regional health authority who were employed at the primary health care  
12  
13 6 management-level and an additional representative from the Newfoundland and Labrador Department  
14  
15 7 of Health and Community Services.

16  
17  
18 8 The survey questionnaire consisted of 21 questions, distributed across 13 pages (Appendix 1).  
19  
20  
21 9 Responses to items on the questionnaire were categorical. For each program or service, respondents  
22  
23 10 could indicate whether it was ‘not delivered’ or offered by ‘on-site personnel’, ‘a visiting health care  
24  
25 11 professional’, or ‘telehealth’. Respondents could choose all delivery modes that applied, although  
26  
27 responses were not mandatory. If a program or service was delivered by any mode, it was coded as  
28  
29 12 “Delivered”. The survey was reviewed in detail by all members of the Primary Health Care Review  
30  
31 13 Working Group for content and clarity and to ensure that the questions would have meaning for  
32  
33 14 respondents within each regional health authority across the province.  
34  
35 15

36  
37 16 Data were collected from June 2015 to February 2016. A member of the Primary Health Care  
38  
39 17 Review Working Group identified all primary health care sites in their region, as well as a  
40  
41 18 representative at each site to complete the survey. An email was distributed by the chair to the  
42  
43 19 representative, informing them they had been identified to complete the survey. The survey was  
44  
45 20 voluntary, completed by the employee at their workplace. No incentives were offered. Representatives  
46  
47 21 were sent instructions to complete the survey and a link to the site where the survey was hosted  
48  
49 22 (SurveyMonkey). Each respondent was asked to indicate site name and address, ensuring there was  
50  
51 23 only one response per site. Respondents were free to go back in the questionnaire and change answers  
52  
53 24 as required.  
54  
55  
56  
57  
58  
59  
60

1  
2  
3 1 The survey collected data on site location, hours of operation, and details about primary health  
4  
5 2 care programs and services delivered at the site (e.g., chronic disease prevention and management,  
6  
7 3 prenatal and early child development, team-based care). Select variables from the survey were  
8  
9 4 requested from the Newfoundland and Labrador Centre for Health Information for use within this  
10  
11 5 study. Location of site was requested to analyze primary health care by rural/urban status. Data were  
12  
13  
14 6 also provided for types of routine primary care services (e.g., family physician, laboratory, and nurse  
15  
16 7 practitioner services), chronic disease prevention and management services (e.g., cancer screening,  
17  
18 8 diabetes education), and types of chronic disease prevention and management programming (e.g.,  
19  
20  
21 9 arthritis, hypertension).

## 22 23 10 **Statistical Analysis**

24  
25 11 Descriptive analyses were performed (RB) to determine percentages and frequencies of each  
26  
27 12 response within each question. Sites missing responses for individual questions were removed from  
28  
29 13 analyses of those questions but maintained for analyses where responses were present. This resulted in  
30  
31 14 slightly different sample sizes for each question. Chi-square tests were performed to compare  
32  
33 15 differences in responses between urban and rural sites.  
34  
35  
36

37 16 Rural/urban status was determined using standard geographical classification codes for the  
38  
39 17 census subdivision in which the site was located. These census subdivision codes were grouped into  
40  
41 18 statistical area classification (SAC), which indicates whether a census subdivision is part of a  
42  
43 19 metropolitan area (CMA), census agglomeration (CA), census metropolitan influenced zone (MIZ), or  
44  
45 20 neither. SAC types are ordered hierarchically, from 1 indicating the census subdivision is within a  
46  
47 21 metropolitan area to 7 indicating a census subdivision outside of census metropolitan area or a census  
48  
49 22 agglomeration area having no metropolitan influence (13). Sites with a SAC code of 1-3 (CMA or CA)  
50  
51 23 were coded as 'urban' while those with a SAC code of four or greater were coded as 'rural' (13). This  
52  
53  
54  
55  
56  
57  
58  
59  
60

1 definition was developed by Statistics Canada and allows for national comparisons of study results.

2 IBM SPSS Statistics version 24 (IBM Corporation) was used for analysis.

### 3 **Ethics Approval**

4 This study was approved by the Newfoundland and Labrador Health Research Ethics Board.

## 5 **RESULTS**

6 The response rate was 99.4% (153/154 questionnaires returned). The completion rate was  
7 96.7%; four returned questionnaires were missing responses to the majority of questions and therefore  
8 excluded from the analysis. Position titles of respondents were site manager/site lead/director (69.3%,  
9 n=106), nurse (17.0%, n=26), facilitator/coordinator (4.6%, n=7), executive (3.3%, n=5),  
10 administrative personnel (2.6%, n=4), or other (3.3%, n=5). Most sites were classified as rural (75.2%).

### 11 **Description of Primary Health Care Services**

12 Table 1 displays types of routine primary care services delivered at or by primary health care  
13 sites. Family physician services were available in 65.5% (n=145) of sites and nurse practitioners at  
14 51.4% (n=144). Fewer sites had 24/7 emergency department (32.1%, n=140) or 24/7 primary care  
15 services (32.1%, n=137) available. Table 2 shows allied health services available at primary health care  
16 sites in Newfoundland and Labrador. Clinical nutritional counselling and education (46.6%, n=146)  
17 and occupational therapy (46.3%, n=147) services were most commonly offered by sites; few sites  
18 offered respiratory therapy (14.6%, n=144) or audiology (15.9%, n=145) services. Table 3 displays the  
19 availability of chronic disease prevention and management services within primary health care sites.  
20 Cancer screening services, such as cervical (59.7%, n=144), colon (41.5%, n=142), and prostate  
21 (42.6%, n=141), were highly available across sites. Various education and self-management services  
22 such as healthy eating (76.8%, n=138), tobacco cessation (74.3%, n=144), diabetes education (52.8%,  
23 n=144), and a local self-management program titled “Improving Health My Way” (46.5%, n=142)  
24 were offered by sites as well.

1  
2  
3 1 Data for delivery by an on-site employee are included in Tables 1-3. Table 3 also includes data  
4  
5 2 for visiting health care professional and telehealth delivery. Briefly, most programs and services were  
6  
7 3 delivered by an on-site employee. This was followed by visiting health care professional and telehealth.

8  
9 4 Focused, team-based care was offered at 40.9% (n=149) of sites. Rural sites were more likely to  
10  
11 5 offer team-based care (45.6% vs. 25.7%), although this difference was not significant. Table 4 shows  
12  
13 6 types of team-based care offered at primary health care sites across Newfoundland and Labrador. For  
14  
15 7 example, team-based care was available for diabetes education (20.8%, n=31), mental health and  
16  
17 8 addictions (13.4%, n=20), and chronic disease prevention and management (12.2%, n=18). Data for  
18  
19 9 targeted, disease-specific chronic disease prevention and management programming are available in  
20  
21 10 Appendix 2.

#### 22 23 24 25 11 **Availability of Services in Urban vs. Rural Sites**

26  
27  
28 12 When comparing services available between urban and rural sites, generally a greater  
29  
30 13 proportion of rural sites offered various primary health care programs and services than urban sites. A  
31  
32 14 significantly greater percentage of rural sites offered family physician services (76.6% vs 29.4%,  
33  
34 15  $p<0.001$ ), laboratory (47.7% vs. 27.3%.  $p<0.05$ ), and 24-hour emergency department services (36.4%  
35  
36 16 vs. 18.2%.  $p<0.05$ ) compared to urban sites. A greater percentage of rural sites also reported offering  
37  
38 17 speech and language pathologist services compared to urban sites (33.6% vs. 11.4%,  $p<0.05$ ). No other  
39  
40 18 significant differences regarding allied health services were found between urban and rural sites. In  
41  
42 19 addition, a significantly greater percentage of respondents from primary health care sites in rural  
43  
44 20 settings reported offering screening for prostate (50.0% vs. 18.2%;  $p<0.01$ ), cervical (67.6% vs, 33.3%;  
45  
46 21  $p<.001$ ), and colon (46.8% vs. 24.2%;  $p\leq.05$ ) cancer, as well as cholesterol (53.7% vs. 30.3%;  $p\leq.05$ ).  
47  
48 22 Diabetes education services were reported to be offered at a greater percentage of rural sites (59.1% vs.  
49  
50 23 32.4%;  $p\leq.01$ ) while physical activity services were more often reported at urban sites (76.5% vs.  
51  
52 24 57.8%;  $p\leq.05$ ).



## 1 INTERPRETATION

2 The aim of this study was to describe the delivery of primary health care programs and services  
3 by regional health authorities across Newfoundland and Labrador, and to examine differences in  
4 availability of these programs and services between urban and rural regions of the province. Routine  
5 primary health care services, cancer screening, and self-management and education services were  
6 offered by the greatest proportion of sites. Findings indicate that regional health authority-funded rural  
7 primary health care sites in Newfoundland and Labrador offer a greater variety of services when  
8 compared to regional health authority-funded sites in urban areas. Furthermore, results suggest that  
9 telehealth is underused for primary health care. Primary health care services, such as self-management  
10 and education, and routine primary care services, such as family physician or nurse practitioner  
11 services could be made more widely available through telehealth.

12 Although the study results describe the many primary health care services that were delivered in  
13 Newfoundland and Labrador, this study does not offer evidence for how this affects the health of  
14 people of the province. Typically, the health of people in rural communities, as compared to those in  
15 urban communities, is worse (14–16). Furthermore, future studies should link data from this survey  
16 with administrative health data sources (e.g., lab, hospitalization, emergency department visits) and  
17 other health outcomes data, such as the Canadian Chronic Disease Surveillance System (CCDSS) or  
18 Chronic Disease Registry, to determine the efficacy of primary health care services. Furthermore,  
19 although the study results describe the types or locations of available services, they do not include rates  
20 of access to or awareness of these services. Potential barriers to service access at these sites should also  
21 be examined. It is expected that differences in access to primary health care services will be related to  
22 differences in chronic disease outcomes. Identifying health system characteristics and other factors  
23 associated with disease outcomes would offer direction for future health policy and health care system  
24 reform.

1  
2  
3 1 Of the sites examined in this study, most sites were considered rural (75.2%; n=115). A greater  
4  
5 2 percentage of people living in Newfoundland and Labrador reside in rural communities (~50%),  
6  
7 3 compared to the national average (~17%) (12,17). Newfoundland and Labrador's population is sparse  
8  
9 4 and spread over a large geographic area, creating the need for many primary health care sites servicing  
10  
11 5 small communities. Additionally, these sites may be the only health care site available to those in these  
12  
13 6 communities; therefore, they may act as a "one-stop shop" for health care in these communities. This is  
14  
15 7 similar to Local Health Hubs proposed for communities in rural Ontario. This model ensures core  
16  
17 8 services are offered by hubs (e.g. mental health and addictions, emergency, primary care) to ensure a  
18  
19 9 comprehensive range of services are available (18). Through the offering of these core services,  
20  
21 10 patients can access the care they need closer to home, thereby removing this barrier to health care and  
22  
23 11 improve health outcomes for rural patients.  
24  
25  
26

27  
28 12 Findings from this study confirm previous research on use of telehealth in Newfoundland and  
29  
30 13 Labrador. Although telehealth has been available in Newfoundland and Labrador for more than 30  
31  
32 14 years, the province has been slow to implement the delivery of primary health care services through  
33  
34 15 telehealth (19,20). Telehealth services have potential to improve disease self-management and reduce  
35  
36 16 disparities in health service access across rural communities (21,22). Although telehealth is used  
37  
38 17 extensively at many rural sites in the province for specialist chronic disease management services, it  
39  
40 18 appears to be underutilized in primary health care (5). Increased use of technology has the potential to  
41  
42 19 improve access to primary health care services in the province.  
43  
44  
45

## 46 20 **Limitations**

47  
48 21 This study included all regional health authority funded primary health care sites. Services  
49  
50 22 offered by non-regional health authority-funded employees, such as fee-for-service physicians, were  
51  
52 23 not included. Fee-for-service physicians are more likely to work in urban Newfoundland and Labrador  
53  
54 24 and it is very uncommon for these physicians to offer allied health services from their offices. This may  
55  
56  
57  
58  
59  
60

1  
2  
3 1 account for some of the rural/urban disparity observed. This study addresses a major gap in  
4  
5 2 Newfoundland and Labrador about the availability of primary health care services/programs and sets  
6  
7 3 the foundation for future studies to examine primary care services offered by all primary health care  
8  
9 4 sites, including fee-for-service.

11  
12 5 The data collection tool used in this study presented some limitations including lack of testing  
13  
14 6 for psychometric properties. Rather, the questionnaire was descriptive in nature and the working group  
15  
16 7 developed each item ensuring that it would be relevant to respondents across all regional health  
17  
18 8 authorities. The questionnaire used in this study asked participants to indicate whether the service was  
19  
20 9 delivered at the site (yes/no) and the mode of delivery. Data do not indicate whether the services are  
21  
22 10 regularly accessed by patients or how health care professionals are offering services to their patients.  
23  
24 11 Future studies should examine whether patients are aware of these services, whether they are accessible  
25  
26 12 and how frequently services are accessed.

27  
28  
29  
30 13 Strengths of this survey include the high response rate (96.7%), that it includes virtually all  
31  
32 14 regional health authority-funded primary health care sites, as well as the breadth of details captured  
33  
34 15 through the survey. This is the first known provincial survey to capture details regarding primary health  
35  
36 16 care services in the province and provides timely and relevant information to inform current primary  
37  
38 17 health care reform initiatives.

## 41 18 **Conclusion**

42  
43  
44 19 The results of this study suggest that there is variability in the availability and nature of primary  
45  
46 20 health care services across the province, with a greater proportion of rural sites offering programs and  
47  
48 21 services compared to urban sites. Considering that half of the people of Newfoundland and Labrador  
49  
50 22 live in rural communities (12,17), it may be that these sites must act as a “one-stop-shop” for health  
51  
52 23 care. This description of primary health care programs and services in Newfoundland and Labrador  
53  
54 24 indicates areas of health care delivery in need of optimization and is an important first step for future  
55  
56  
57  
58  
59  
60

1  
2  
3  
4  
5  
6  
7  
8  
9  
10  
11  
12  
13  
14  
15  
16  
17  
18  
19  
20  
21  
22  
23  
24  
25  
26  
27  
28  
29  
30  
31  
32  
33  
34  
35  
36  
37  
38  
39  
40  
41  
42  
43  
44  
45  
46  
47  
48  
49  
50  
51  
52  
53  
54  
55  
56  
57  
58  
59  
60

1 health care policy and reform. Future research is needed to determine which components of primary  
2 health care are associated with improvements in chronic disease prevalence and outcomes.

Confidential

**FOOTNOTES**

**Competing interests:** None declared.

**Contributors:** All of the authors were involved in the concept and design of the study. Julia Lukewich acquired the data. Richard Buote performed the data analysis and all authors contributed to data interpretation. Richard Buote drafted the manuscript, which all authors critically revised for intellectual content. All of the authors gave final approval of the version to be published and agreed to be accountable for all aspects of the work.

**Acknowledgements:** Thanks to Janelle Hippe and the Newfoundland and Labrador Centre for Health Information for their support throughout the development of this manuscript.

**Funding:** This work was funded by Memorial University of Newfoundland's School of Nursing

## REFERENCES

1. Glazier RH. Balancing equity issues in health systems: perspectives of primary healthcare. *Healthc Pap.* 2007;8(sp):35–45. Available from: doi:10.12927/hcpap.2007.19218
2. Chan M. Primary health care as a route to health security. *Lancet.* 2009;373:1586–7. Available from: doi.org/10.1016/S0140-6736(09)60003-9
3. World Health Organization. The world health report 2008 - Primary health care (Now more than ever). Geneva, CH. World Health Organization; 2008. 105 p.
4. Centre for Surveillance and Applied Research Public Health Agency of Canada. Canadian Chronic Disease Indicators, 2017 Edition. Ottawa, ON; 2017. Available from: <https://infobase.phac-aspc.gc.ca/ccdi-imcc/data-tool/>
5. Department of Health and Community Services. Healthy people, healthy families, healthy communities: A primary health care framework for Newfoundland and Labrador 2015-2025. St. John's, NL. Government of Newfoundland and Labrador; 2015. 44 p.
6. Canadian Institutes for Health Information. Primary health care in Canada - A chartbook of selected indicator results. Ottawa, ON; 2016. 60 p.
7. Hutchison B, Levesque JF, Strumpf E, Coyle N. Primary health care in Canada: systems in motion. *Milbank Q.* 2011;89(2):256–88.
8. Ontario Government Ministry of Health and Long-Term Care. Ontario's action plan for health care: Better patient care through better value from our health care dollars. Ottawa, ON. Queen's Printer for Ontario; 2012. 16 p. Available from: [http://www.health.gov.on.ca/en/ms/ecfa/healthy\\_change/docs/rep\\_healthychange.pdf](http://www.health.gov.on.ca/en/ms/ecfa/healthy_change/docs/rep_healthychange.pdf)
9. Nova Scotia Health Authority. Health services planning [Internet]. 2015. Available from: <http://www.nshealth.ca/about-us/plans-and-reports/health-services-planning>
10. Sibley LM, Weiner JP. An evaluation of access to health care services along the rural-urban continuum in Canada. *BMC Health Serv Res.* 2011;11(20).
11. Wong ST, Regan S. Patient perspectives on primary health care in rural communities: effects of geography on access, continuity and efficiency. *Rural Remote Health.* 2009;9(1):1142.
12. Statistics Canada. Focus on Geography Series, 2016 Census. In: Statistics Canada Catalogue no 98-404-X2016001. Ottawa, ON; 2017.
13. Statistics Canada. Census metropolitan influenced zone (MIZ) [Internet]. Census Dictionary. 2015. Available from: <http://www12.statcan.gc.ca/census-recensement/2011/ref/dict/geo010-eng.cfm>
14. Pong RW, DesMeules M, Lagacé C. Rural-urban disparities in health: How does Canada fare and how does Canada compare with Australia? *Aust J Rural Health.* 2009;17(1):58–64. Available from: doi: 10.1111/j.1440-1584.2008.01039.x.
15. DesMeules M, Pong RW, Read Guernsey J, Wang F, Luo W, Dressler MP. Rural health status and determinants in Canada. In: Kulig JC, Williams AM, editors. *Health in Rural Canada.* Vancouver: UBC Press; 2011. p. 23-43.

16. Knight JC, Mathews M, Aubrey-Bassler K. Relation between family physician retention and avoidable hospital admission in Newfoundland and Labrador: a population-based cross-sectional study. *CMAJ Open*. 2017;5(4):E746–52.
17. Canadian Rural Revitalization Foundation. State of Rural Canada Report 2015. Canadian Rural Revitalization Foundation; 2015. 107 p.
18. Ontario Hospital Association. Local health hubs for rural and northern communities. Toronto, ON. Ontario Hospital Association; 2012. 31 p.
19. COACH: Canada's Health Informatics Association. 2015 Canadian Telehealth Report. Toronto, ON. COACH; 2015. 71 p. Available from: <https://livecare.ca/sites/default/files/2015%20TeleHealth-Public-eBook-Final-10-9-15-secured.pdf>
20. Newfoundland and Labrador Centre for Health Information. Telehealth [Internet]. Available from: <https://www.nlchi.nl.ca/index.php/ehealth-systems/telehealth>
21. Jaglal SB, Haroun VA, Salbach NM, Hawker G, Voth J, Lou W, et al. Increasing access to chronic disease self-management programs in rural and remote communities using telehealth. *Telemed J E Health*. 2013;19(6):467–73.
22. Taylor-Gjevre R, Nair B, Bath B, Okpalauwaekwe U, Sharma M, Penz E, et al. Addressing rural and remote access disparities for patients with inflammatory arthritis through video-conferencing and innovative inter-professional care models. *Musculoskeletal Care*. 2017; 16(1):90-5. Available from: doi:10.1002/msc.1215

1  
2  
3 1 Title: The organization of primary health care services for those with chronic disease across  
4 2 Newfoundland and Labrador: a descriptive analysis of publicly funded service provision ~~The~~  
5 3 ~~organization of primary health care services for those with chronic disease across Newfoundland and~~  
6 4 ~~Labrador: a descriptive analysis of service provision~~

8 5 Buote, R. BSc, MSc<sup>1</sup>, Asghari, S. MD, PhD<sup>2, 3</sup>, Aubrey-Bassler, K. MSc, MD<sup>2, 4</sup>, Knight, J.C. PhD<sup>1, 4, 5</sup>,  
9 6 Lukewich, J. RN, PhD<sup>1, 6</sup>

11 7 <sup>1</sup> Division of Community Health and Humanities, Memorial University of Newfoundland, St. John's,  
12 8 NL, Canada

14 9 <sup>2</sup> Discipline of Family Medicine, Memorial University of Newfoundland, St. John's, NL, Canada

16 10 <sup>3</sup> Center for Rural Health Studies, St. John's, NL, Canada

18 11 <sup>4</sup> Primary Healthcare Research Unit, Faculty of Medicine, Memorial University of Newfoundland, St.  
19 12 John's, NL, Canada

21 13 <sup>5</sup> Health Analytics and Information Services, Newfoundland and Labrador Centre for Health  
22 14 Information, St. John's, NL, Canada

24 15 <sup>6</sup> School of Nursing, Memorial University of Newfoundland, St. John's, NL, Canada

26 16 Corresponding author:

28 17 Dr. Julia Lukewich

30 18 jlukewich@mun.ca

32 19 School of Nursing

33 20 Memorial University of Newfoundland

34 21 300 Prince Philip Dr.

35 22 St. John's, NL, Canada

36 23 A1B 3V6



## ABSTRACT

**Background:** Newfoundland and Labrador has a rapidly aging population, poor health behaviours, high rates of chronic disease, and a rural population, presenting a unique challenge to health care

delivery. The aim of this study is to describe the availability of publicly funded primary health care programs and services delivered by regional health authorities across Newfoundland and Labrador the province.

**Methods:** A descriptive analysis was performed on a cross-sectional provincial primary health care survey. Survey data included location of site, disease-specific chronic disease prevention programming, types of routine primary care, allied health prevention and promotion, chronic disease prevention and management services, and team-based care. Mode of service delivery was identified for most programs and services.

**Results:** Surveys were returned by 153 sites (99.4% response rate). Family physician services were available at 66% (n=145) and nurse practitioner at 51% (n=144) of sites. Generally, many sites offered screening for cervical (59.7%, n=144), colon (41.5%, n=142), and prostate cancers (42.6%, n=141), and various self-management and education services. Allied health services, such as clinical nutritional counselling (46.6%, n=146) and occupational therapy (46.3%, n=147) were frequently available.

Available health care services were most often offered by on-site staff members, while few used telehealth. Overall, rural sites offered a greater variety of services, as compared to urban sites.

**Interpretation:** There is considerable variability in the range of primary health care services available across Newfoundland and Labrador, with limited delivery of some primary health care programs and services. Future research should examine how availability of these programs and services effects health outcomes and costs, in Newfoundland and Labrador.

## INTRODUCTION

It is well-established that health systems with a strong primary health care sector achieve better outcomes at lower cost (1). Primary health care is a critical component of quality health care delivery for people with chronic disease (2,3). For Canadians, the most prevalent conditions include diabetes, chronic obstructive pulmonary disease, COPD, ischemic heart disease, and cancer (4). Further, it is estimated that approximately 29% of Canadians have at least one chronic disease and 7% have two or more (4).<sup>1</sup> Prevalence of chronic disease in Newfoundland and Labrador is higher than the national average; close to one third of the population has one or more chronic diseases and about 9% have two or more (4). This burden on the provincial health care system is further challenged by high health care use and hospitalization rates, and poor retention of primary health care providers, especially in rural and remote communities (5,6).

To address the increasing prevalence of and costs associated with chronic diseases, Canada's provinces and territories are reforming primary health care delivery and examining specific attributes of primary health care systems that support or hinder high-quality care (7). The goal of the provincial and territorial health care systems is to ensure patients have access to the care they need; when and where they need it (8,9). National studies have indicated inequities in care between urban and rural areas, with rural regions of the country reporting lower likelihood of accessing health care services, attributed to greater barriers accessing care (e.g., travel times, greater cost) (10,11). As a result, Canadians living in rural areas are more likely to report poorer health outcomes than their urban counterparts. Given that approximately 50% of people in Newfoundland and Labrador reside in a rural

---

<sup>1</sup> One of five major chronic diseases, as identified by Canadian Community Health Survey (CCHS); cancer, diabetes, cardiovascular diseases (heart disease and/or stroke), chronic respiratory diseases (asthma and/or chronic obstructive pulmonary disease) and mood and anxiety disorders.

1  
2  
3 1 community (12), it is important to examine the primary health care attributes for populations living in  
4  
5 2 different geographical settings. ~~Although one study conducted in Western Newfoundland has indicated~~  
6  
7 3 ~~difficulties with individuals accessing primary health care services (18), to this point no study has~~  
8  
9 4 ~~established the availability and nature of primary health care services across the province as a whole.~~

10  
11  
12 5 Therefore, the aim of this study is to describe the availability of primary health care programs and  
13  
14 6 services provided by regional health authorities across Newfoundland and Labrador. Specifically, the  
15  
16 7 objectives of this study are:

17  
18 8 (1) To describe the availability of primary health care programs and services for chronic diseases  
19  
20  
21 9 provided by regional health authorities across Newfoundland and Labrador, and

22  
23 10 (2) To examine differences in the nature of programs and services for chronic diseases provided by  
24  
25 11 regional health authorities available in urban and rural regions of Newfoundland and Labrador.

## 26 12 **METHODS**

### 27 13 **Design**

28  
29  
30 14 This study is a descriptive analysis performed on a cross-sectional provincial primary health  
31  
32  
33 15 care survey of publicly funded primary health care sites conducted by the Newfoundland and Labrador  
34  
35 16 Centre for Health Information. ~~This study was approved by the Newfoundland and Labrador Health~~  
36  
37 17 ~~Research Ethics Board.~~

### 38 18 **Setting**

39  
40  
41 19 Primary health care sites funded through regional health authorities in Newfoundland and  
42  
43  
44 20 Labrador (i.e. Eastern Health, Central Health, Western Health, and Labrador-Grenfell Health)  
45  
46  
47 21 identified by the Primary Health Care Review Working Group were surveyed (n=154). A primary  
48  
49  
50 22 health care site was defined as any location that offered primary health care services (e.g. primary care,  
51  
52  
53 23 community support centres, mental health care). ~~Although~~ This sample represents all publicly funded  
54  
55 24 primary health care sites across the province. ~~any~~ Privately funded sites, such as fee-for-service

1 ~~practices, are not represented in these data (comprise . For example, A~~ approximately 65% of  
2 ~~physicians in Newfoundland and Labrador) are privately funded~~ paid from a fee-for-service model and  
3 ~~practice in private offices and therefore are not included in these data~~ (14).

#### 4 **Source of Data**

5 This survey was administered by the Newfoundland and Labrador Centre for Health  
6 Information, ~~in partnership with the Department of Health and Community Services, Government of~~ of  
7 ~~Newfoundland and Labrador. The goal of the survey was to with the goal of~~ identifying primary health  
8 care services offered across the province. To develop the questionnaire, a working group was  
9 established by the Newfoundland and Labrador Centre for Health Information. This working group was  
10 chaired by an employee of the Newfoundland and Labrador Centre for Health Information and  
11 consisted of two members from each provincial regional health authority who were employed at the  
12 primary health care management-level and an additional representative from the Newfoundland and  
13 Labrador Department of Health and Community Services.

14 The survey questionnaire consisted of 21 questions, distributed across 13 pages (Appendix 1).  
15 Responses to items on the questionnaire were categorical. For each program or service, respondents  
16 could indicate whether it was ‘not delivered’ or offered by ‘on-site personnel’, ‘a visiting health care  
17 professional’, or ‘telehealth’. Respondents could choose all delivery modes that applied, although  
18 responses were not mandatory. If a program or service was delivered by any mode, it was coded as  
19 “Delivered”. The survey was reviewed in detail by all members of the Primary Health Care Review  
20 Working Group for content and clarity and to ensure that the questions would have meaning for  
21 respondents within each regional health authority across the province.

22 Data were collected from June 2015 to February 2016. ~~In an effort to sample the entire~~  
23 ~~population, A~~ A member of the Primary Health Care Review Working Group identified all primary  
24 health care sites in their region, as well as a representative at each site to complete the survey. An email

1 was distributed by the chair to the representative, informing them they had been identified to complete  
2 the survey. The survey was voluntary, completed by the employee at their workplace. No incentives  
3 were offered. Representatives were sent instructions to complete the survey and a link to the site where  
4 the survey was hosted (SurveyMonkey). Each respondent was asked to indicate site name and address,  
5 ensuring there was only one response per site. Respondents were free to go back in the questionnaire  
6 and change answers as required.

7 The survey collected data on site location, hours of operation, and details about primary health  
8 care programs and services delivered at the site (e.g., chronic disease prevention and management,  
9 prenatal and early child development, team-based care). Select variables from the survey were  
10 requested from the Newfoundland and Labrador Centre for Health Information for use within this  
11 study. Location of site was requested to analyze primary health care by rural/urban status. Data were  
12 also provided for types of routine primary care services (e.g., family physician, laboratory, and nurse  
13 practitioner services), chronic disease prevention and management services (e.g., cancer screening,  
14 diabetes education), and types of chronic disease prevention and management programming (e.g.,  
15 arthritis, hypertension).

### 16 **Statistical Analysis**

17 Descriptive analyses were performed (RB) to determine percentages and frequencies of each  
18 response within each question. Sites missing responses for individual questions were removed from  
19 analyses of those questions but maintained for analyses where responses were present. This resulted in  
20 slightly different sample sizes for each question. Chi-square tests were performed to compare  
21 differences in responses between urban and rural sites.

22 Rural/urban status was determined using standard geographical classification codes for the  
23 census subdivision in which the site was located. These census subdivision codes were grouped into  
24 statistical area classification (SAC), which indicates whether a census subdivision is part of a

1 metropolitan area (CMA), census agglomeration (CA), census metropolitan influenced zone (MIZ), or  
2 neither. SAC types are ordered hierarchically, from 1 indicating the census subdivision is within a  
3 metropolitan area to 7 indicating a census subdivision outside of census metropolitan area or a census  
4 agglomeration area having no metropolitan influence (13). Sites with a SAC code of 1-3 (CMA or CA)  
5 were coded as 'urban' while those with a SAC code of four or greater were coded as 'rural' (13). This  
6 definition was developed by Statistics Canada and allows for national comparisons of study results.

7 IBM SPSS Statistics version 24 (IBM Corporation) was used for analysis.

### 8 **Ethics Approval**

9 This study was approved by the Newfoundland and Labrador Health Research Ethics Board.

## 10 **RESULTS**

11 The response rate was 99.4% (n=153/-out of 154 questionnaires returned); however, fThe  
12 completion rate was 96.7%; four returned questionnaires were missing responses to the majority of  
13 questions and therefore excluded from the analysis. incomplete not completed to the final page  
14 (i.e., completion rate 149/153, 96.7% answer to one or more questions missing; 96.7% complete,  
15 n=149). Position titles of respondents were site manager/site lead/director (69.3%, n=106), nurse  
16 (17.0%, n=26), facilitator/coordinator (4.6%, n=7), executive (3.3%, n=5), administrative personnel  
17 (2.6%, n=4), or other (3.3%, n=5). Most sites were classified as rural (75.2%).

### 18 **Description of Primary Health Care Services**

19 Table 1 displays types of routine primary care services delivered at or by primary health care  
20 sites. Family physician services were available in 65.5% (n=145) of sites and nurse practitioners at  
21 51.4% (n=144). Fewer sites had 24/7 emergency department (32.1%, n=140) or 24/7 primary care  
22 services (32.1%, n=137) available. Table 2 shows allied health services available at primary health care  
23 sites in Newfoundland and Labrador. Clinical nutritional counselling and education (46.6%, n=146)  
24 and occupational therapy (46.3%, n=147) services were most commonly offered by sites; few sites

1  
2  
3 1 offered respiratory therapy (14.6%, n=144) or audiology (15.9%, n=145) services. Table 3 displays the  
4  
5 2 availability of chronic disease prevention and management services within primary health care sites.  
6  
7 3 Cancer screening services, such as cervical (59.7%, n=144), colon (41.5%, n=142), and prostate  
8  
9 4 (42.6%, n=141), were highly available across sites. Various education and self-management services  
10  
11 5 such as healthy eating (76.8%, n=138), tobacco cessation (74.3%, n=144), diabetes education (52.8%,  
12  
13 n=144), and a local self-management program titled “Improving Health My Way” (46.5%, n=142)  
14  
15 6 were offered by sites as well.  
16  
17 7

18  
19 8 Data for delivery by an on-site employee are included in Tables 1-3. Table 3 also includes data  
20  
21 9 for visiting health care professional and telehealth delivery. Briefly, most programs and services were  
22  
23 10 delivered by an on-site employee. This was followed by visiting health care professional and telehealth.  
24

25  
26 11 Focused, team-based care was offered at 40.9% (n=149) of sites. Rural sites were more likely to  
27  
28 12 offer team-based care (45.6% vs. 25.7%), although this difference was not significant. Table 4 shows  
29  
30 13 types of team-based care offered at primary health care sites across Newfoundland and Labrador. For  
31  
32 14 example, team-based care was available for diabetes education (20.8%, n=31), mental health and  
33  
34 15 addictions (13.4%, n=20), and chronic disease prevention and management (12.2%, n=18). Data for  
35  
36 16 targeted, disease-specific chronic disease prevention and management programming are available in  
37  
38 17 Appendix 2.  
39  
40

#### 41 18 **Availability of Services in Urban vs. Rural Sites**

42  
43  
44 19 When comparing services available between urban and rural sites, generally a greater  
45  
46 20 proportion of rural sites offered various primary health care programs and services than urban sites. A  
47  
48 21 significantly greater percentage of rural sites offered family physician services (76.6% vs 29.4%,  
49  
50 22  $p<0.001$ ), laboratory (47.7% vs. 27.3%.  $p<0.05$ ), and 24-hour emergency department services (36.4%  
51  
52 vs. 18.2%.  $p<0.05$ ) compared to urban sites. A greater percentage of rural sites also reported offering  
53  
54 23 speech and language pathologist services compared to urban sites (33.6% vs. 11.4%,  $p<0.05$ ). No other  
55  
56 24  
57  
58  
59  
60

1  
2  
3 1 significant differences regarding allied health services were found between urban and rural sites. In  
4  
5 2 addition, a significantly greater percentage of respondents from primary health care sites in rural  
6  
7 3 settings reported offering screening for prostate (50.0% vs. 18.2%;  $p < 0.01$ ), cervical (67.6% vs, 33.3%;  
8  
9 4  $p < .001$ ), and colon (46.8% vs. 24.2%;  $p \leq .05$ ) cancer, as well as cholesterol (53.7% vs. 30.3%;  $p \leq .05$ ).  
10  
11  
12 5 Diabetes education services were reported to be offered at a greater percentage of rural sites (59.1% vs.  
13  
14 6 32.4%;  $p \leq .01$ ) while physical activity services were more often reported at urban sites (76.5% vs.  
15  
16 7 57.8%;  $p \leq .05$ ).

## 18 8 **INTERPRETATION**

20  
21 9 The aim of this study was to describe the delivery of primary health care programs and services  
22  
23 10 by regional health authorities across Newfoundland and Labrador, and to examine differences in  
24  
25 11 availability of these programs and services between urban and rural regions of the province. Routine  
26  
27  
28 12 primary health care services, cancer screening, and self-management and education services were  
29  
30 13 offered by the greatest proportion of sites. Findings indicate that regional health authority-funded rural  
31  
32 14 primary health care sites in Newfoundland and Labrador offer a greater variety of services when  
33  
34  
35 15 compared to regional health authority-funded sites in urban areas. Furthermore, results suggest that  
36  
37 16 telehealth is underused for primary health care. Primary health care services, such as self-management  
38  
39 17 and education, and routine primary care services, such as family physician or nurse practitioner  
40  
41  
42 18 services could be made more widely available through telehealth.

43  
44 19 Although the study results describe the many primary health care services that were delivered in  
45  
46 20 Newfoundland and Labrador, this study does not offer evidence for how this affects the health of  
47  
48 21 people of the province. Typically, the health of people in rural communities, as compared to those in  
49  
50  
51 22 urban communities, is worse (14–16). Furthermore, future studies should link data from this survey  
52  
53 23 with administrative health data sources (e.g., lab, hospitalization, emergency department visits) and  
54  
55 24 other health outcomes data, such as the Canadian Chronic Disease Surveillance System (CCDSS) or



1  
2  
3 1 Chronic Disease Registry, to determine the efficacy of primary health care services. Furthermore,  
4  
5 2 although the study results describe the types or locations of available services, they do not include rates  
6  
7 3 of access to or awareness of these services. Potential barriers to service access at these sites should also  
8  
9 4 be examined. It is expected that differences in access to primary health care services will be related to  
10  
11 5 differences in chronic disease outcomes. Identifying health system characteristics and other factors  
12  
13 6 associated with disease outcomes would offer direction for future health policy and health care system  
14  
15 7 reform.

18 8 Of the sites examined in this study, most sites were considered rural (75.2%; n=115). A greater  
19  
20 9 percentage of people living in Newfoundland and Labrador reside in rural communities (~50%),  
21  
22 10 compared to the national average (~17%) (12,17). Newfoundland and Labrador's population is sparse  
23  
24 11 and spread over a large geographic area, creating the need for many primary health care sites servicing  
25  
26 12 small communities. Additionally, these sites may be the only health care site available to those in these  
27  
28 13 communities; therefore, they may act as a "one-stop shop" for health care in these communities. This is  
29  
30 14 similar to Local Health Hubs proposed for communities in rural Ontario. This model ensures core  
31  
32 15 services are offered by hubs (e.g. mental health and addictions, emergency, primary care) to ensure a  
33  
34 16 comprehensive range of services are available (18). Through the offering of these core services,  
35  
36 17 patients can access the care they need closer to home, thereby removing this barrier to health care and  
37  
38 18 improve health outcomes for rural patients.

43  
44 19 Findings from this study confirm previous research on use of telehealth in Newfoundland and  
45  
46 20 Labrador. Although telehealth has been available in Newfoundland and Labrador for more than 30  
47  
48 21 years, the province has been slow to implement the delivery of primary health care services through  
49  
50 22 telehealth (19,20). Telehealth services have potential to improve disease self-management and reduce  
51  
52 23 disparities in health service access across rural communities (21,22). Although telehealth is used  
53  
54 24 extensively at many rural sites in the province for specialist chronic disease management services, it  
55  
56  
57  
58  
59  
60

1  
2  
3 1 appears to be underutilized in primary health care (5). Increased use of technology has the potential to  
4  
5 2 improve access to primary health care services in the province.

### 6 7 3 **Limitations**

8  
9 4 This study included all regional health authority funded primary health care sites. Services  
10  
11 5 offered by non-regional health authority-funded employees, such as fee-for-service physicians, were  
12  
13 6 not included. Fee-for-service physicians are more likely to work in urban Newfoundland and Labrador  
14  
15 7 and it is very uncommon for these physicians to offer allied health services from their offices. This may  
16  
17 8 account for some of the rural/urban disparity observed. This study addresses a major gap in  
18  
19 9 Newfoundland and Labrador about the availability of primary health care services/programs and sets  
20  
21 10 the foundation for future studies to examine primary care services offered by all primary health care  
22  
23 11 sites, including fee-for-service.

24  
25  
26  
27  
28 12 The data collection survey tool used in this study presented some limitations including lack of  
29  
30 13 testing for psychometric properties. First, the tool was not validated. This may have contributed to the  
31  
32 14 amount of missing data and varying sample sizes. Second, the tool was not tested for psychometric  
33  
34 15 properties. Instead, rather, the questionnaire survey was descriptive in nature and the working group  
35  
36 16 developed each item ensuring that it would be relevant to respondents across all regional health  
37  
38 17 authorities. questions were developed by the working group, ensuring questions would be meaningful  
39  
40 18 for employees in their regions. Finally, the questionnaire used in this study asked participants to  
41  
42 19 indicate whether the service was delivered at the site (yes/no) and the mode of delivery. Data do not  
43  
44 20 indicate whether the services are regularly accessed by patients or how health care professionals are  
45  
46 21 offering services to their patients. Future studies should examine whether patients are aware of these  
47  
48 22 services, whether they are accessible and how frequently services are accessed.

49  
50  
51  
52  
53 23 Strengths of this survey include the high response rate (96.7%), that it includes virtually all  
54  
55 24 regional health authority-funded primary health care sites, as well as the breadth of details captured

1  
2  
3 1 through the survey. This is the first known provincial survey to capture details regarding primary health  
4  
5 2 care services in the province and provides timely and relevant information to inform current primary  
6  
7 3 health care reform initiatives.

#### 9 4 **Conclusion**

11  
12 5 The results of this study suggest that there is variability in the availability and nature of primary  
13  
14 6 health care services across the province, with a greater proportion of rural sites offering programs and  
15  
16 7 services compared to urban sites. Considering that half of the people of Newfoundland and Labrador  
17  
18 8 live in rural communities (12,17), it may be that these sites must act as a “one-stop-shop” for health  
19  
20  
21 9 care. This description of primary health care programs and services in Newfoundland and Labrador  
22  
23 10 indicates areas of health care delivery in need of optimization and is an important first step for future  
24  
25  
26 11 health care policy and reform. Future research is needed to determine which components of primary  
27  
28 12 health care are associated with improvements in chronic disease prevalence and outcomes.

**FOOTNOTES**

**Competing interests:** None declared.

**Contributors:** All of the authors were involved in the concept and design of the study. Julia Lukewich acquired the data. Richard Buote performed the data analysis and all authors contributed to data interpretation. Richard Buote drafted the manuscript, which all authors critically revised for intellectual content. All of the authors gave final approval of the version to be published and agreed to be accountable for all aspects of the work.

**Acknowledgements:** Thanks to Janelle Hippe and the Newfoundland and Labrador Centre for Health Information for their support throughout the development of this manuscript.

**Funding:** This work was funded by Memorial University of Newfoundland's School of Nursing

**REFERENCES**

1. Glazier RH. Balancing equity issues in health systems: perspectives of primary healthcare. *Healthc Pap.* 2007;8(sp):35–45. Available from: doi:10.12927/hcpap.2007.19218
2. Chan M. Primary health care as a route to health security. *Lancet.* 2009;373:1586–7. Available from: doi.org/10.1016/S0140-6736(09)60003-9
3. World Health Organization. The world health report 2008 - Primary health care (Now more than ever). Geneva, CH. World Health Organization; 2008. 105 p.
4. Centre for Surveillance and Applied Research Public Health Agency of Canada. Canadian Chronic Disease Indicators, 2017 Edition. Ottawa, ON; 2017. Available from: <https://infobase.phac-aspc.gc.ca/ccdi-imcc/data-tool/>
5. Department of Health and Community Services. Healthy people, healthy families, healthy communities: A primary health care framework for Newfoundland and Labrador 2015-2025. St. John's, NL. Government of Newfoundland and Labrador; 2015. 44 p.
6. Canadian Institutes for Health Information. Primary health care in Canada - A chartbook of selected indicator results. Ottawa, ON; 2016. 60 p.
7. Hutchison B, Levesque JF, Strumpf E, Coyle N. Primary health care in Canada: systems in motion. *Milbank Q.* 2011;89(2):256–88.
8. Ontario Government Ministry of Health and Long-Term Care. Ontario's action plan for health care: Better patient care through better value from our health care dollars. Ottawa, ON. Queen's Printer for Ontario; 2012. 16 p. Available from: [http://www.health.gov.on.ca/en/ms/ecfa/healthy\\_change/docs/rep\\_healthychange.pdf](http://www.health.gov.on.ca/en/ms/ecfa/healthy_change/docs/rep_healthychange.pdf)
9. Nova Scotia Health Authority. Health services planning [Internet]. 2015. Available from: <http://www.nshealth.ca/about-us/plans-and-reports/health-services-planning>
10. Sibley LM, Weiner JP. An evaluation of access to health care services along the rural-urban continuum in Canada. *BMC Health Serv Res.* 2011;11(20).
11. Wong ST, Regan S. Patient perspectives on primary health care in rural communities: effects of geography on access, continuity and efficiency. *Rural Remote Health.* 2009;9(1):1142.
12. Statistics Canada. Focus on Geography Series, 2016 Census. In: Statistics Canada Catalogue no 98-404-X2016001. Ottawa, ON; 2017.
13. Statistics Canada. Census metropolitan influenced zone (MIZ) [Internet]. Census Dictionary. 2015. Available from: <http://www12.statcan.gc.ca/census-recensement/2011/ref/dict/geo010-eng.cfm>
14. Pong RW, DesMeules M, Lagacé C. Rural-urban disparities in health: How does Canada fare and how does Canada compare with Australia? *Aust J Rural Health.* 2009;17(1):58–64. Available from: doi: 10.1111/j.1440-1584.2008.01039.x.
15. DesMeules M, Pong RW, Read Guernsey J, Wang F, Luo W, Dressler MP. Rural health status and determinants in Canada. In: Kulig JC, Williams AM, editors. *Health in Rural Canada.* Vancouver: UBC Press; 2011. p. 23-43.

16. Knight JC, Mathews M, Aubrey-Bassler K. Relation between family physician retention and avoidable hospital admission in Newfoundland and Labrador: a population-based cross-sectional study. *CMAJ Open*. 2017;5(4):E746–52.
17. Canadian Rural Revitalization Foundation. State of Rural Canada Report 2015. Canadian Rural Revitalization Foundation; 2015. 107 p.
18. Ontario Hospital Association. Local health hubs for rural and northern communities. Toronto, ON. Ontario Hospital Association; 2012. 31 p.
19. COACH: Canada's Health Informatics Association. 2015 Canadian Telehealth Report. Toronto, ON. COACH; 2015. 71 p. Available from: <https://livecare.ca/sites/default/files/2015%20TeleHealth-Public-eBook-Final-10-9-15-secured.pdf>
20. Newfoundland and Labrador Centre for Health Information. Telehealth [Internet]. Available from: <https://www.nlchi.nl.ca/index.php/ehealth-systems/telehealth>
21. Jaglal SB, Haroun VA, Salbach NM, Hawker G, Voth J, Lou W, et al. Increasing access to chronic disease self-management programs in rural and remote communities using telehealth. *Telemed J E Health*. 2013;19(6):467–73.
22. Taylor-Gjevre R, Nair B, Bath B, Okpalauwaekwe U, Sharma M, Penz E, et al. Addressing rural and remote access disparities for patients with inflammatory arthritis through video-conferencing and innovative inter-professional care models. *Musculoskeletal Care*. 2017; 16(1):90-5. Available from: doi:10.1002/msc.1215

Table 1. Types of routine primary care services delivered at or by PHC site by urban/rural status, n (%).<sup>1</sup>

|                               | Nurse Practitioner<br>Services n=144 | Family Physician<br>Services n=145 | X-Ray Services<br>n=141 | Laboratory<br>Services n=142 | 24/7 Emergency Department<br>Services<br>n=140 | 24/7 Primary Care<br>Services<br>n=137 |
|-------------------------------|--------------------------------------|------------------------------------|-------------------------|------------------------------|------------------------------------------------|----------------------------------------|
| Delivered                     | 74 (51.4)                            | 95 (65.5)***                       | 42 (29.8)               | 61 (43.0)*                   | 45 (32.1)*                                     | 44 (32.1)                              |
| Urban                         | 14 (40.0)                            | 10 (29.4)                          | 6 (18.8)                | 9 (27.3)                     | 6 (18.2)                                       | 7 (21.2)                               |
| Rural                         | 60 (55.0)                            | 85 (76.6)                          | 36 (33.0)               | 52 (47.7)                    | 39 (36.4)                                      | 37 (35.6)                              |
| On-site delivery <sup>2</sup> | 59 (79.7)                            | 63 (66.3)                          | 41 (97.6)               | 55 (90.2)                    | 44 (97.8)                                      | 43 (97.7)                              |
| Urban                         | 13 (92.9)                            | 6 (60.0)                           | 6 (100.0)               | 8 (88.8)                     | 6 (100.0)                                      | 7 (100.0)                              |
| Rural                         | 46 (76.7)                            | 57 (67.1)                          | 35 (97.2)               | 47 (90.4)                    | 38 (84.4)                                      | 36 (97.3)                              |

\* p ≤ .05

\*\*\* p &lt; 0.001

Confidential

<sup>1</sup> Sample sizes differ between tables due to differing response rates of each question.<sup>2</sup> Data shown for delivery by an on-site employee. If not delivered by on-site employee, service was delivered by visiting health care professional or telehealth.

Table 2. Types of Allied Health Prevention and Promotion Services delivered at or by PHC site by urban/rural status, n (%).

|                  | Audiology<br>n=145 | Occupational<br>Therapy<br>n=147 | Injury Prev.<br>& Education<br>n=141 | Clin. nutritional<br>counselling/<br>Education<br>n=146 | Physiotherapy<br>n=147 | Recreation<br>Therapy<br>n=144 | Respiratory<br>Therapy<br>n=144 | Speech Lang.<br>Path<br>n=145 |
|------------------|--------------------|----------------------------------|--------------------------------------|---------------------------------------------------------|------------------------|--------------------------------|---------------------------------|-------------------------------|
| Delivered        | 23 (15.9)          | 68 (46.3)                        | 56 (39.7)                            | 68 (46.6)                                               | 45 (30.6)              | 23 (16.0)                      | 21 (14.6)                       | 41 (28.3)*                    |
| Urban            | 4 (11.8)           | 15 (42.9)                        | 14 (41.2)                            | 17 (48.6)                                               | 11 (31.4)              | 8 (22.2)                       | 5 (14.7)                        | 4 (11.4)                      |
| Rural            | 19 (17.1)          | 53 (47.3)                        | 42 (39.3)                            | 51 (45.9)                                               | 34 (30.4)              | 15 (13.9)                      | 16 (14.5)                       | 37 (33.6)                     |
| On-site delivery | 10 (43.5)*         | 31 (45.6)***                     | 33 (58.9)                            | 41 (60.3)                                               | 25 (55.6)*             | 19 (82.6)                      | 12 (57.1)                       | 16 (39.0)**                   |
| Urban            | 4 (100.0)          | 13 (86.7)                        | 11 (78.6)                            | 12 (70.6)                                               | 9 (81.8)               | 7 (87.5)                       | 4 (80.0)                        | 4 (100.0)                     |
| Rural            | 6 (31.6)           | 18 (34.0)                        | 22 (52.4)                            | 29 (56.9)                                               | 16 (47.1)              | 12 (80.0)                      | 8 (50.0)                        | 12 (32.4)                     |

\* p ≤ .05  
 \*\* p < 0.01  
 \*\*\* p < 0.001

Confidential



Table 3. Types of chronic disease prevention and management services delivered at or by PHC site by urban/rural status, n (%)

|                  | Blood Pressure<br>n=143 | Breast Screening<br>n=142 | Cervical<br>Screening<br>n=144 | Colon<br>Screening<br>n=142 | Prostate<br>Screening<br>n=141 | Cholesterol<br>Screening<br>n=141 | Improving<br>Health My Way<br>n=142 | Self-<br>management<br>n=141 |
|------------------|-------------------------|---------------------------|--------------------------------|-----------------------------|--------------------------------|-----------------------------------|-------------------------------------|------------------------------|
| Delivered        | 96 (67.1)               | 66 (46.5)                 | 86 (59.7)***                   | 59 (41.5)*                  | 60 (42.6)**                    | 68 (48.2)*                        | 66 (46.5)                           | 52 (36.9)                    |
| Urban            | 20 (58.8)               | 11 (33.3)                 | 11 (33.3)                      | 8 (24.2)                    | 6 (18.2)                       | 10 (30.3)                         | 12 (36.4)                           | 12 (34.3)                    |
| Rural            | 76 (69.7)               | 55 (50.5)                 | 75 (67.6)                      | 51 (46.8)                   | 54 (50.0)                      | 58 (53.7)                         | 54 (49.5)                           | 40 (37.7)                    |
| On-site delivery | 83 (86.5)               | 56 (84.8)                 | 71 (82.6)                      | 55 (93.2)                   | 50 (83.3)                      | 56 (82.4)                         | 37 (56.1)                           | 37 (71.2)                    |
| Urban            | 17 (85.0)               | 10 (90.9)                 | 10 (90.9)                      | 8 (100.0)                   | 6 (100.0)                      | 8 (80.0)                          | 7 (58.3)                            | 9 (75.0)                     |
| Rural            | 66 (86.8)               | 46 (83.6)                 | 61 (81.3)                      | 47 (92.2)                   | 44 (81.5)                      | 48 (82.8)                         | 30 (55.6)                           | 28 (70.0)                    |
| Telehealth       | 0 (0.0)                 | 0 (0.0)                   | 0 (0.0)                        | 0 (0.0)                     | 0 (0.0)                        | 1 (1.5)                           | 2 (3.0)                             | 2 (3.8)                      |
| Urban            | 0 (0.0)                 | 0 (0.0)                   | 0 (0.0)                        | 0 (0.0)                     | 0 (0.0)                        | 0 (0.0)                           | 0 (0.0)                             | 0 (0.0)                      |
| Rural            | 0 (0.0)                 | 0 (0.0)                   | 0 (0.0)                        | 0 (0.0)                     | 0 (0.0)                        | 1 (1.7)                           | 2 (3.7)                             | 2 (5.0)                      |

  

|                  | Diabetes<br>Education<br>n=144 | Foot Assessment<br>n=138 | Healthy<br>Eating<br>n=138 | Heart Failure<br>n=139 | Injury Prevention<br>n=142 | Obesity<br>Mgmt.<br>n=138 | Physical<br>Activity<br>n=143 | Tobacco<br>Cessation<br>n=144 |
|------------------|--------------------------------|--------------------------|----------------------------|------------------------|----------------------------|---------------------------|-------------------------------|-------------------------------|
| Delivered        | 76 (52.8)**                    | 78 (56.5)                | 106 (76.8)                 | 33 (23.7)              | 70 (49.3)                  | 35 (25.4)                 | 89 (62.2)*                    | 107 (74.3)                    |
| Urban            | 11 (32.4)                      | 14 (42.4)                | 25 (75.8)                  | 7 (21.2)               | 17 (51.5)                  | 6 (18.2)                  | 26 (76.5)                     | 28 (82.4)                     |
| Rural            | 65 (59.1)                      | 64 (61.0)                | 81 (77.1)                  | 26 (24.5)              | 53 (48.6)                  | 29 (27.6)                 | 63 (57.8)                     | 79 (71.8)                     |
| On-site delivery | 61 (80.3)                      | 66 (84.6)                | 85 (80.2)                  | 20 (60.6)              | 56 (80.0)                  | 25 (71.4)                 | 74 (83.1)                     | 90 (84.1)                     |
| Urban            | 9 (81.8)                       | 12 (85.7)                | 22 (88.0)                  | 5 (71.4)               | 15 (88.2)                  | 5 (83.3)                  | 24 (92.3)                     | 24 (85.7)                     |
| Rural            | 52 (80.0)                      | 54 (84.4)                | 63 (77.8)                  | 15 (57.7)              | 41 (77.4)                  | 20 (69.0)                 | 50 (79.4)                     | 66 (83.5)                     |
| Telehealth       | 8 (10.5)                       | 0 (0.0)                  | 2 (1.9)                    | 2 (6.1)                | 0 (0.0)                    | 1 (2.9)                   | 0 (0.0)                       | 1 (0.9)                       |
| Urban            | 0 (0.0)                        | 0 (0.0)                  | 0 (0.0)                    | 0 (0.0)                | 0 (0.0)                    | 0 (0.0)                   | 0 (0.0)                       | 0 (0.0)                       |
| Rural            | 8 (12.3)                       | 0 (0.0)                  | 2 (2.5)                    | 2 (7.7)                | 0 (0.0)                    | 1 (3.4)                   | 0 (0.0)                       | 1 (1.3)                       |

\* p ≤ .05

\*\* p &lt; 0.01

\*\*\* p &lt; 0.001

1  
2  
3  
4  
5  
6  
7  
8  
9  
10  
11  
12  
13  
14  
15  
16  
17  
18  
19  
20  
21  
22  
23  
24  
25  
26  
27  
28  
29  
30  
31  
32  
33  
34  
35  
36  
37  
38  
39  
40  
41  
42  
43  
44  
45  
46  
47

Table 4. Types of focused, team-based care delivered at PHC site, n (%)

| Type of team-based care (n = 149)                             |           |
|---------------------------------------------------------------|-----------|
| Diabetes Care & Education                                     | 31 (20.8) |
| Mental Health and Addictions                                  | 20 (13.4) |
| Chronic Disease Prevention & Management                       | 18 (12.2) |
| Childhood Development, Intellectual and Physical Disabilities | 14 (9.4)  |
| Primary Health Care                                           | 11 (7.4)  |
| Cancer Care & Screening                                       | 9 (6.0)   |
| Rehabilitative Care                                           | 7 (4.7)   |
| Acute/Emergency Care                                          | 6 (4.0)   |
| Home and Community Care                                       | 6 (4.0)   |
| Long Term Care Services/Placements                            | 6 (4.0)   |
| Respiratory Chronic Disease Management                        | 6 (4.0)   |
| Allied Health Care                                            | 5 (3.4)   |
| Community Support                                             | 5 (3.4)   |
| Palliative Care                                               | 5 (3.4)   |
| Public Health                                                 | 5 (3.4)   |
| Autism Care                                                   | 3 (2.0)   |
| Individual Support Services Program                           | 3 (2.0)   |
| Refugee Health                                                | 3 (2.0)   |
| Sexual Health                                                 | 3 (2.0)   |
| Social Services                                               | 3 (2.0)   |
| Community Advisory Committee                                  | 2 (1.3)   |
| Community Care                                                | 2 (1.3)   |
| Discharge Planning                                            | 2 (1.3)   |
| Dressing Clinic                                               | 2 (1.3)   |
| FASD Care                                                     | 2 (1.3)   |
| Orthopedic Clinic                                             | 2 (1.3)   |
| Other <sup>a</sup>                                            | 7 (4.7)   |

<sup>a</sup>Hematology, inpatient care team, interim care, medical day care, mentoring students, occupational health, preadmission clinic

## Survey Information

This survey is designed to gather information on the delivery of primary health care services across the province of Newfoundland and Labrador. We are interested in the number of primary health care sites operating across the province, the services delivered by those sites, and how and by whom services are delivered. We are also interested in the ways in which RHA primary health care providers collaborate with each other and with other non-RHA primary health care providers.

For the purposes of this survey, primary health care can be defined as the day-to-day services and supports needed to protect, maintain or restore our health. For most people, it is both their first point of contact with the health care system and the health services they use most often. Primary health care can include interactions with providers such as community volunteers, counsellors, health educators, family doctors, occupational therapists, pharmacists, registered nurses, social workers, and others. It includes services that promote health and wellness, prevent illness, treat health issues or injuries, and diagnose and manage chronic health conditions. While primary health care may take place at health care facilities such as health centres or hospitals, primary health care is *not the specialized medical services* received in a health care facility like a hospital or a cancer clinic.

In this survey, a "primary health care site" is defined as a physical location (such as a community office, health centre or hospital) where primary care or primary health care services are offered by RHA staff. These services may be delivered by telehealth, on-site staff, or visiting staff. This definition of a primary health care site excludes stand-alone long-term care facilities.

This survey has been developed by the Newfoundland and Labrador Centre for Health Information in collaboration with the Department of Health and Community Services and the Primary Health Care Review Working Group. The results of this survey will be used in a larger report on the organization of primary health care services in Newfoundland and Labrador. If you have any questions while you are completing this survey, or if you require any technical assistance, please contact:

**Janelle Hippe**  
Program Evaluation Consultant  
Newfoundland and Labrador Centre for Health Information  
Phone: (709) 752-6021  
Email: [janelle.hippe@nlchi.nl.ca](mailto:janelle.hippe@nlchi.nl.ca)

or

**Melody Sorenson**  
Program Evaluation Consultant  
Newfoundland and Labrador Centre for Health Information  
Phone: (709) 752-6182  
Email: [melody.sorenson@nlchi.nl.ca](mailto:melody.sorenson@nlchi.nl.ca)

1  
2  
3  
4  
5  
6  
7  
8  
9  
10  
11  
12  
13  
14  
15  
16  
17  
18  
19  
20  
21  
22  
23  
24  
25  
26  
27  
28  
29  
30  
31  
32  
33  
34  
35  
36  
37  
38  
39  
40  
41  
42  
43  
44  
45  
46  
47  
48  
49  
50  
51  
52  
53  
54  
55  
56  
57  
58  
59  
60

Confidential

## Respondent Information

**This section is designed to gather information about your position title and responsibilities.**

1. What is your position title? (e.g. Site Coordinator)

2. What are the primary responsibilities of your position? (check any that apply)

- Oversight of all site operations
- Oversight of some site operations
- Oversight of some regional operations/programs
- Oversight of some on-site primary health care providers
- Oversight of all on-site primary health care providers
- Oversight of some regional primary health care providers
- Clinical duties

Other (please specify)

ntial

1  
2  
3  
4  
5  
6  
7  
8  
9  
10  
11  
12  
13  
14  
15  
16  
17  
18  
19  
20  
21  
22  
23  
24  
25  
26  
27  
28  
29  
30  
31  
32  
33  
34  
35  
36  
37  
38  
39  
40  
41  
42  
43  
44  
45  
46  
47  
48  
49  
50  
51  
52  
53  
54  
55  
56  
57  
58  
59  
60

## Site Information

**This section is designed to gather specific information about your primary health care site, including the location and hours of operation of your site as well as the communities serviced by your site.**

3. Please indicate the name and location of the site that you are reporting on.

Site name:

Site address:

Site city/town:

4. Which of the following best describes your primary health care site:

- The site I am reporting on offers only primary health care.
- The site I am reporting on offers primary health care services and some medical specialist services (e.g. visiting physician specialists).
- The site I am reporting on offers primary health care services, medical specialist services, and tertiary-level care.

5. Please enter your site hours (Emergency and non-Emergency) for each day of a typical week (e.g. 9:00am to 4:00pm). If different services at your site operate during different hours, please indicate hours for each service and separate your entries with a semi-colon (e.g. "diabetes education, 9:00am-12:00pm; outpatient clinics, 9:00am-8:00pm; all other services, 9:00am-4:30pm"). You will have been provided with a reference list of primary health care services to complete this survey. If you have not been provided with a reference list of services, please contact [janelle.hippe@nlchi.nl.ca](mailto:janelle.hippe@nlchi.nl.ca) or [melody.sorenson@nlchi.nl.ca](mailto:melody.sorenson@nlchi.nl.ca) to obtain one.

Note that if a service at your site is only provided through Emergency (for example, if a nurse practitioner is working at your site, but works only in Emergency), then for the purposes of this survey, that service is considered an Emergency service.

Monday (non-Emergency hours):

Monday (Emergency hours):

Tuesday (non-Emergency hours):

Tuesday (Emergency hours):

Wednesday (non-Emergency hours):

Wednesday (Emergency hours):

Thursday (non-Emergency hours):

Thursday (Emergency hours):

Friday (non-Emergency hours):

Friday (Emergency hours):

Saturday (non-Emergency hours):

Saturday (Emergency hours):

Sunday (non-Emergency hours):

Sunday (Emergency hours):

1  
2  
3  
4  
5  
6  
7  
8  
9  
10  
11  
12  
13  
14  
15  
16  
17  
18  
19  
20  
21  
22  
23  
24  
25  
26  
27  
28  
29  
30  
31  
32  
33  
34  
35  
36  
37  
38  
39  
40  
41  
42  
43  
44  
45  
46  
47  
48  
49  
50  
51  
52  
53  
54  
55  
56  
57  
58  
59  
60

6. Please indicate the Regional Health Authority responsible for your site.

- Eastern Regional Health Authority
- Central Regional Health Authority
- Western Regional HealthyAuthority
- Labrador-Grenfell Regional Health Authority

Confidential



## Eastern Health Region Community List

Please check all of the communities serviced by your site.

- All communities in the Eastern Regional Health Authority
- All communities in the Province
- Admiral's Beach
- Admiral's Cove
- Aquaforte
- Arnold's Cove
- Arnold's Cove Station
- Avondale
- Baine Harbour
- Bareneed
- Bauline
- Bay Bulls
- Bay de Verde
- Bay L'Argent
- Bay Roberts
- Beau Bois
- Bell Island
- Bellevue
- Bellevue Beach
- Big Barachois
- Birchy Cove
- Biscay Bay
- Bishop's Cove
- Black River
- Blaketown
- Bloomfield
- Boat Harbour

- 1  Branch
- 2
- 3  Brigus
- 4
- 5  Brigus Junction
- 6
- 7  Brigus South
- 8
- 9  Bristol's Hope
- 10
- 11  Broad Cove
- 12
- 13  Brooklyn
- 14
- 15  Brookside
- 16
- 17  Brownsdale
- 18
- 19  Bryant's Cove
- 20
- 21  Bunyan's Cove
- 22
- 23  Burgoynes Cove
- 24
- 25  Burin
- 26
- 27  Burin Bay Arm
- 28
- 29  Burnt Point
- 30
- 31  Butler Cove
- 32
- 33  Calvert
- 34
- 35  Canning's Cove
- 36
- 37  Cape Broyle
- 38
- 39  Caplin Cove/Low Point
- 40
- 41  Caplin/Southport
- 42
- 43  Carbonear
- 44
- 45  Catalina
- 46
- 47  Cavendish
- 48
- 49  Champney's West
- 50
- 51  Chance Cove
- 52
- 53  Chapel Arm
- 54
- 55  Chapel Cove
- 56
- 57  Charleston
- 58
- 59  Charlottetown
- 60
- 61  Clarenville

1  
2  
3  
4  
5  
6  
7  
8  
9  
10  
11  
12  
13  
14  
15  
16  
17  
18  
19  
20  
21  
22  
23  
24  
25  
26  
27  
28  
29  
30  
31  
32  
33  
34  
35  
36  
37  
38  
39  
40  
41  
42  
43  
44  
45  
46  
47  
48  
49  
50  
51  
52  
53  
54  
55  
56  
57  
58  
59  
60

- Clarke's Beach
- Clifton
- Colley's Point South
- Colinet
- Colliers
- Come By Chance
- Conception Bay South
- Conception Harbour
- Creston
- Creston North
- Cupids
- Cuslett
- Daniel's Cove
- Deer Park/Vineland Road
- Dildo
- Dunfield
- Duntara
- Elliston
- English Harbour East
- English Harbour, Trinity Bay
- Epworth Great Salmonier
- Fairhaven
- Fermeuse
- Ferryland
- Flatrock
- Forest Field-New Bridge
- Fox Cove Mortier
- Fox Harbour
- Frenchman's Cove
- Freshwater, Conception Bay
- Freshwater, Placentia Bay

- 1  Garden Cove
- 2
- 3  Garnish
- 4
- 5  Gaskiers/Point La Haye
- 6
- 7  George's Brook
- 8
- 9  Gin Cove
- 10
- 11  Goobies
- 12
- 13  Gooseberry Cove
- 14
- 15  Grand Bank
- 16
- 17  Grand Beach
- 18
- 19  Grand le Pierre
- 20
- 21  Grates Cove
- 22
- 23  Green's Harbour
- 24
- 25  Gull Island
- 26
- 27  Hant's Harbour
- 28
- 29  Harbour Grace
- 30
- 31  Harbour Main/Chapel's Cove/Lakeview
- 32
- 33  Harbour Mille/Little Harbour East
- 34
- 35  Harcourt-Munroe-Waterville
- 36
- 37  Harricott
- 38
- 39  Heart's Content
- 40
- 41  Heart's Delight/Islington
- 42
- 43  Heart's Desire
- 44
- 45  Hibbs Cove
- 46
- 47  Hickman's Harbour
- 48
- 49  Hillview/Adeytown/Hatchet Cove/St. Jones/Deep Bight/Queen's Cove
- 50
- 51  Hodderville
- 52
- 53  Hodge's Cove
- 54
- 55  Holyrood
- 56
- 57  Hopeall
- 58
- 59  Jean de Baie
- 60
- 61  Jersey-side

- 1  Job's Cove
- 2
- 3  Keels
- 4
- 5  King's Cove
- 6
- 7  Kingston
- 8
- 9  Knight's Cove
- 10
- 11  L'Anse au Loup
- 12
- 13  La Manche
- 14
- 15  Lamaline
- 16
- 17  Lawn
- 18
- 19  Lead Cove
- 20
- 21  Lethbridge
- 22
- 23  Lewin's Cove
- 24
- 25  Little Bay East
- 26
- 27  Little Bay, Placentia Bay
- 28
- 29  Little Catalina
- 30
- 31  Little Harbour, Placentia Bay
- 32
- 33  Little Heart's Ease
- 34
- 35  Little St. Lawrence
- 36
- 37  Logy Bay/Middle Cove/Outer Cove
- 38
- 39  Long Beach
- 40
- 41  Long Harbour/Mount Arlington Heights
- 42
- 43  Lord's Cove
- 44
- 45  Lower Amherst Cove
- 46
- 47  Lower Island Cove
- 48
- 49  Lower Lance Cove/Britannia
- 50
- 51  Makinsons
- 52
- 53  Main Point/Davidsville
- 54
- 55  Mall Bay
- 56
- 57  Markland
- 58
- 59  Marystown
- 60  Melrose

- 1  Middle Amherst Cove
- 2
- 3  Milton
- 4
- 5  Mobile
- 6
- 7  Monkstown
- 8
- 9  Morley's Siding
- 10
- 11  Mount Carmel/Mitchell's Brook/St. Catherine's
- 12
- 13  Mount Pearl
- 14
- 15  Muddy Brook
- 16
- 17  Musgravetown
- 18
- 19  New Bonaventure
- 20
- 21  New Chelsea
- 22
- 23  New Harbour
- 24
- 25  New Melbourne
- 26
- 27  New Perlican
- 28
- 29  Newman's Cove
- 30
- 31  Norman's Cove/Long Cove
- 32
- 33  North Harbour, Placentia Bay
- 34
- 35  North Harbour, St. Mary's Bay
- 36
- 37  North River
- 38
- 39  North West Brook/Ivany's Cove
- 40
- 41  Northern Bay
- 42
- 43  O'Donnell's
- 44
- 45  Ochre Pit Cove
- 46
- 47  Old Bonaventure
- 48
- 49  Old Perlican
- 50
- 51  Old Shop
- 52
- 53  Open Hall/Red Cliffe
- 54
- 55  Paradise
- 56
- 57  Parkers Cove
- 58
- 59  Patrick's Cove-Angel's Cove
- 60
- 61  Perry's Cove

- 1  Petite Forte
- 2
- 3  Petty Harbour/Maddox Cove
- 4
- 5  Placentia
- 6
- 7  Plate Cove East
- 8
- 9  Plate Cove West
- 10
- 11  Point au Gaul
- 12  Point Lance
- 13
- 14  Point May
- 15
- 16  Point Verde
- 17
- 18  Port au Bras
- 19
- 20  Port Blandford
- 21
- 22  Port de Grave
- 23
- 24  Port Kirwan
- 25
- 26  Port Rexton
- 27
- 28  Port Union
- 29
- 30  Portland-Jamestown-Winterbrook
- 31
- 32  Portugal Cove South
- 33  Portugal Cove/St. Phillips
- 34
- 35  Pouch Cove
- 36
- 37  Princeton
- 38
- 39  Random Island
- 40
- 41  Red Harbour
- 42
- 43  Red Head Cove
- 44
- 45  Renews/Cappahayden
- 46
- 47  Riverhead
- 48
- 49  Roache's Line
- 50
- 51  Rock Harbour
- 52
- 53  Rushoon
- 54
- 55  Salmon Cove
- 56
- 57  Shearstown
- 58  Ship Harbour, Placentia Bay
- 59
- 60

1  
2  
3  
4  
5  
6  
7  
8  
9  
10  
11  
12  
13  
14  
15  
16  
17  
18  
19  
20  
21  
22  
23  
24  
25  
26  
27  
28  
29  
30  
31  
32  
33  
34  
35  
36  
37  
38  
39  
40  
41  
42  
43  
44  
45  
46  
47  
48  
49  
50  
51  
52  
53  
54  
55  
56  
57  
58  
59  
60

- Shoe Cove
- Sibley's Cove
- Small Point/Adam's Cove/Blackhead/Broad Cove
- South Dildo
- South River
- Southeast Bight
- Southern Bay
- Southern Harbour
- Spaniard's Bay
- Spanish Room
- Spillars Cove
- Spread Eagle
- St. Bernard's/Jacques Fontaine
- St. Bride's
- St. John's
- St. Joseph's
- St. Lawrence
- St. Mary's
- St. Michael's
- St. Shott's
- St. Vincents/St. Stephen's/Peter's River
- Stock Cove
- Summerville
- Sunnyside
- Sweet Bay
- Swift Current
- Taylor's Bay
- Terrenceville
- The Dock
- Thorburn Lake
- Thornlea



1  
2  
3  
4  
5  
6  
7  
8  
9  
10  
11  
12  
13  
14  
15  
16  
17  
18  
19  
20  
21  
22  
23  
24  
25  
26  
27  
28  
29  
30  
31  
32  
33  
34  
35  
36  
37  
38  
39  
40  
41  
42  
43  
44  
45  
46  
47  
48  
49  
50  
51  
52  
53  
54  
55  
56  
57  
58  
59  
60

- Tickle Cove
- Torbay
- Tors Cove/Burnt Cove/Bauline South
- Trepassey
- Trinity Bay North
- Trinity East
- Trinity, Trinity Bay
- Trouty
- Turk's Cove
- Upper Amherst Cove
- Upper Island Cove
- Victoria
- Wabana
- Western Bay
- Whitbourne
- Whiteway
- Winterland
- Winterton
- Witless Bay
- Witless Bay Line
- Woody Island

Other (please specify)

1  
2  
3  
4  
5  
6  
7  
8  
9  
10  
11  
12  
13  
14  
15  
16  
17  
18  
19  
20  
21  
22  
23  
24  
25  
26  
27  
28  
29  
30  
31  
32  
33  
34  
35  
36  
37  
38  
39  
40  
41  
42  
43  
44  
45  
46  
47  
48  
49  
50  
51  
52  
53  
54  
55  
56  
57  
58  
59  
60

### Site Services

**This section is designed to gather information about the primary health care services provided at your site, as well as information about how those services are provided.**

7. What types of Routine Primary Care Services are provided at or by your site and how are they delivered?

|                                              | service not delivered    | service delivered by telehealth | service delivered by visiting health care provider(s) | service delivered by on-site staff |
|----------------------------------------------|--------------------------|---------------------------------|-------------------------------------------------------|------------------------------------|
| Nurse practitioner services                  | <input type="checkbox"/> | <input type="checkbox"/>        | <input type="checkbox"/>                              | <input type="checkbox"/>           |
| Family physician services                    | <input type="checkbox"/> | <input type="checkbox"/>        | <input type="checkbox"/>                              | <input type="checkbox"/>           |
| X-ray services                               | <input type="checkbox"/> | <input type="checkbox"/>        | <input type="checkbox"/>                              | <input type="checkbox"/>           |
| Laboratory services                          | <input type="checkbox"/> | <input type="checkbox"/>        | <input type="checkbox"/>                              | <input type="checkbox"/>           |
| 24/7 Emergency Department services           | <input type="checkbox"/> | <input type="checkbox"/>        | <input type="checkbox"/>                              | <input type="checkbox"/>           |
| 24/7 Emergency on-call primary care services | <input type="checkbox"/> | <input type="checkbox"/>        | <input type="checkbox"/>                              | <input type="checkbox"/>           |

Other (please specify type of service delivery - telehealth, visiting staff, or on-site staff)

8. What types of Mental Health and Addictions Services are provided at or by your site and how are they delivered?

|                                                  | service not delivered    | service delivered by telehealth | service delivered by visiting health care provider(s) | service delivered by on-site staff |
|--------------------------------------------------|--------------------------|---------------------------------|-------------------------------------------------------|------------------------------------|
| Addictions counseling                            | <input type="checkbox"/> | <input type="checkbox"/>        | <input type="checkbox"/>                              | <input type="checkbox"/>           |
| Assertive Community Treatment                    | <input type="checkbox"/> | <input type="checkbox"/>        | <input type="checkbox"/>                              | <input type="checkbox"/>           |
| Behavioral management services                   | <input type="checkbox"/> | <input type="checkbox"/>        | <input type="checkbox"/>                              | <input type="checkbox"/>           |
| Case management                                  | <input type="checkbox"/> | <input type="checkbox"/>        | <input type="checkbox"/>                              | <input type="checkbox"/>           |
| Crisis response (daytime)                        | <input type="checkbox"/> | <input type="checkbox"/>        | <input type="checkbox"/>                              | <input type="checkbox"/>           |
| Crisis response (after hours)                    | <input type="checkbox"/> | <input type="checkbox"/>        | <input type="checkbox"/>                              | <input type="checkbox"/>           |
| Early psychosis                                  | <input type="checkbox"/> | <input type="checkbox"/>        | <input type="checkbox"/>                              | <input type="checkbox"/>           |
| FASD screening and/or services                   | <input type="checkbox"/> | <input type="checkbox"/>        | <input type="checkbox"/>                              | <input type="checkbox"/>           |
| Mental health counseling                         | <input type="checkbox"/> | <input type="checkbox"/>        | <input type="checkbox"/>                              | <input type="checkbox"/>           |
| Mental health promotion/prevention and education | <input type="checkbox"/> | <input type="checkbox"/>        | <input type="checkbox"/>                              | <input type="checkbox"/>           |
| Psychology services                              | <input type="checkbox"/> | <input type="checkbox"/>        | <input type="checkbox"/>                              | <input type="checkbox"/>           |
| Youth outreach                                   | <input type="checkbox"/> | <input type="checkbox"/>        | <input type="checkbox"/>                              | <input type="checkbox"/>           |

Other (please specify type of service delivery - telehealth, visiting staff, or on-site staff)

1  
2  
3  
4  
5  
6  
7  
8  
9  
10  
11  
12  
13  
14  
15  
16  
17  
18  
19  
20  
21  
22  
23  
24  
25  
26  
27  
28  
29  
30  
31  
32  
33  
34  
35  
36  
37  
38  
39  
40  
41  
42  
43  
44  
45  
46  
47  
48  
49  
50  
51  
52  
53  
54  
55  
56  
57  
58  
59  
60

9. What types of Prenatal and Early Child Development Services are delivered/ supported at or by your site and how are they delivered/supported?

|                                                   | service not delivered    | service delivered by telehealth | service delivered by visiting health care provider(s) | service delivered by on-site staff |
|---------------------------------------------------|--------------------------|---------------------------------|-------------------------------------------------------|------------------------------------|
| Autism services                                   | <input type="checkbox"/> | <input type="checkbox"/>        | <input type="checkbox"/>                              | <input type="checkbox"/>           |
| Breastfeeding support                             | <input type="checkbox"/> | <input type="checkbox"/>        | <input type="checkbox"/>                              | <input type="checkbox"/>           |
| Child development screening and intervention      | <input type="checkbox"/> | <input type="checkbox"/>        | <input type="checkbox"/>                              | <input type="checkbox"/>           |
| Childbirth education                              | <input type="checkbox"/> | <input type="checkbox"/>        | <input type="checkbox"/>                              | <input type="checkbox"/>           |
| Public Health services to Family Resource Centres | <input type="checkbox"/> | <input type="checkbox"/>        | <input type="checkbox"/>                              | <input type="checkbox"/>           |
| Healthy Beginnings/ well baby clinics             | <input type="checkbox"/> | <input type="checkbox"/>        | <input type="checkbox"/>                              | <input type="checkbox"/>           |
| Public Health services to Healthy Baby Clubs      | <input type="checkbox"/> | <input type="checkbox"/>        | <input type="checkbox"/>                              | <input type="checkbox"/>           |
| Parenting clinics                                 | <input type="checkbox"/> | <input type="checkbox"/>        | <input type="checkbox"/>                              | <input type="checkbox"/>           |
| Preschool health checks                           | <input type="checkbox"/> | <input type="checkbox"/>        | <input type="checkbox"/>                              | <input type="checkbox"/>           |
| Public Health services to daycare centres         | <input type="checkbox"/> | <input type="checkbox"/>        | <input type="checkbox"/>                              | <input type="checkbox"/>           |
| School health                                     | <input type="checkbox"/> | <input type="checkbox"/>        | <input type="checkbox"/>                              | <input type="checkbox"/>           |
| Women's health clinics                            | <input type="checkbox"/> | <input type="checkbox"/>        | <input type="checkbox"/>                              | <input type="checkbox"/>           |

Other (please specify type of service delivery - telehealth, visiting staff, or on-site staff)

10. What types of Allied Health Prevention and Promotion Services are delivered at or by your site and how are they delivered?

|                                                  | service not delivered    | service delivered by telehealth | service delivered by visiting health care provider(s) | service delivered by on-site staff |
|--------------------------------------------------|--------------------------|---------------------------------|-------------------------------------------------------|------------------------------------|
| Audiology                                        | <input type="checkbox"/> | <input type="checkbox"/>        | <input type="checkbox"/>                              | <input type="checkbox"/>           |
| Occupational therapy                             | <input type="checkbox"/> | <input type="checkbox"/>        | <input type="checkbox"/>                              | <input type="checkbox"/>           |
| Injury prevention and education                  | <input type="checkbox"/> | <input type="checkbox"/>        | <input type="checkbox"/>                              | <input type="checkbox"/>           |
| Clinical nutritional counseling and/or education | <input type="checkbox"/> | <input type="checkbox"/>        | <input type="checkbox"/>                              | <input type="checkbox"/>           |
| Physiotherapy                                    | <input type="checkbox"/> | <input type="checkbox"/>        | <input type="checkbox"/>                              | <input type="checkbox"/>           |
| Recreation therapy                               | <input type="checkbox"/> | <input type="checkbox"/>        | <input type="checkbox"/>                              | <input type="checkbox"/>           |
| Respiratory therapy                              | <input type="checkbox"/> | <input type="checkbox"/>        | <input type="checkbox"/>                              | <input type="checkbox"/>           |
| Speech language pathology                        | <input type="checkbox"/> | <input type="checkbox"/>        | <input type="checkbox"/>                              | <input type="checkbox"/>           |

Other (please specify type of service delivery - telehealth, visiting staff, or on-site staff)

11. What types of Healthy Aging Services are delivered at or by your site and how are they delivered?

|                                       | service not delivered    | service delivered by telehealth | service delivered by visiting health care provider(s) | service delivered by on-site staff |
|---------------------------------------|--------------------------|---------------------------------|-------------------------------------------------------|------------------------------------|
| Dementia care                         | <input type="checkbox"/> | <input type="checkbox"/>        | <input type="checkbox"/>                              | <input type="checkbox"/>           |
| Fall prevention education             | <input type="checkbox"/> | <input type="checkbox"/>        | <input type="checkbox"/>                              | <input type="checkbox"/>           |
| Healthy aging education and promotion | <input type="checkbox"/> | <input type="checkbox"/>        | <input type="checkbox"/>                              | <input type="checkbox"/>           |
| Home care                             | <input type="checkbox"/> | <input type="checkbox"/>        | <input type="checkbox"/>                              | <input type="checkbox"/>           |
| Home support services                 | <input type="checkbox"/> | <input type="checkbox"/>        | <input type="checkbox"/>                              | <input type="checkbox"/>           |
| Meals on Wheels                       | <input type="checkbox"/> | <input type="checkbox"/>        | <input type="checkbox"/>                              | <input type="checkbox"/>           |
| Palliative care                       | <input type="checkbox"/> | <input type="checkbox"/>        | <input type="checkbox"/>                              | <input type="checkbox"/>           |
| Respite care                          | <input type="checkbox"/> | <input type="checkbox"/>        | <input type="checkbox"/>                              | <input type="checkbox"/>           |

Other (please specify type of service delivery - telehealth, visiting staff, or on-site staff)

12. What types of Communicable Disease Prevention and Control Services are delivered at or by your site and how are they delivered?

|                                                                                      | service not delivered    | service delivered by telehealth | service delivered by visiting health care provider(s) | service delivered by on-site staff |
|--------------------------------------------------------------------------------------|--------------------------|---------------------------------|-------------------------------------------------------|------------------------------------|
| Immunization clinics                                                                 | <input type="checkbox"/> | <input type="checkbox"/>        | <input type="checkbox"/>                              | <input type="checkbox"/>           |
| Sexual and reproductive health clinics                                               | <input type="checkbox"/> | <input type="checkbox"/>        | <input type="checkbox"/>                              | <input type="checkbox"/>           |
| Sexual and reproductive health education                                             | <input type="checkbox"/> | <input type="checkbox"/>        | <input type="checkbox"/>                              | <input type="checkbox"/>           |
| STBBI (Sexually Transmitted and Blood-Born Infections) follow-up and contact tracing | <input type="checkbox"/> | <input type="checkbox"/>        | <input type="checkbox"/>                              | <input type="checkbox"/>           |
| Communicable Diseases (other) follow-up and contact tracing                          | <input type="checkbox"/> | <input type="checkbox"/>        | <input type="checkbox"/>                              | <input type="checkbox"/>           |
| TB testing and screening                                                             | <input type="checkbox"/> | <input type="checkbox"/>        | <input type="checkbox"/>                              | <input type="checkbox"/>           |

Other (please specify type of service delivery - telehealth, visiting staff, or on-site staff)

13. What types of Chronic Disease Prevention and Management Services are delivered at or by your site and how are they delivered?

|                                                       | service not delivered    | service delivered by telehealth | service delivered by visiting health care provider(s) | service delivered by on-site staff |
|-------------------------------------------------------|--------------------------|---------------------------------|-------------------------------------------------------|------------------------------------|
| Blood pressure screening and education                | <input type="checkbox"/> | <input type="checkbox"/>        | <input type="checkbox"/>                              | <input type="checkbox"/>           |
| Cancer screening services - Breast cancer screening   | <input type="checkbox"/> | <input type="checkbox"/>        | <input type="checkbox"/>                              | <input type="checkbox"/>           |
| Cancer screening services - Cervical screening        | <input type="checkbox"/> | <input type="checkbox"/>        | <input type="checkbox"/>                              | <input type="checkbox"/>           |
| Cancer screening services - Colon cancer screening    | <input type="checkbox"/> | <input type="checkbox"/>        | <input type="checkbox"/>                              | <input type="checkbox"/>           |
| Cancer screening services - Prostate cancer screening | <input type="checkbox"/> | <input type="checkbox"/>        | <input type="checkbox"/>                              | <input type="checkbox"/>           |
| Cholesterol screening and education                   | <input type="checkbox"/> | <input type="checkbox"/>        | <input type="checkbox"/>                              | <input type="checkbox"/>           |

1  
2  
3  
4  
5  
6  
7  
8  
9  
10  
11  
12  
13  
14  
15  
16  
17  
18  
19  
20  
21  
22  
23  
24  
25  
26  
27  
28  
29  
30  
31  
32  
33  
34  
35  
36  
37  
38  
39  
40  
41  
42  
43  
44  
45  
46  
47  
48  
49  
50  
51  
52  
53  
54  
55  
56  
57  
58  
59  
60

|                                                                                                    | service not delivered    | service delivered by telehealth | service delivered by visiting health care provider(s) | service delivered by on-site staff |
|----------------------------------------------------------------------------------------------------|--------------------------|---------------------------------|-------------------------------------------------------|------------------------------------|
| Chronic disease self-management - Improving Health My Way                                          | <input type="checkbox"/> | <input type="checkbox"/>        | <input type="checkbox"/>                              | <input type="checkbox"/>           |
| Chronic disease self-management - General (i.e. practitioners trained in self-management approach) | <input type="checkbox"/> | <input type="checkbox"/>        | <input type="checkbox"/>                              | <input type="checkbox"/>           |
| Diabetes education, including insulin education                                                    | <input type="checkbox"/> | <input type="checkbox"/>        | <input type="checkbox"/>                              | <input type="checkbox"/>           |
| Foot assessment                                                                                    | <input type="checkbox"/> | <input type="checkbox"/>        | <input type="checkbox"/>                              | <input type="checkbox"/>           |
| Healthy eating promotion and education                                                             | <input type="checkbox"/> | <input type="checkbox"/>        | <input type="checkbox"/>                              | <input type="checkbox"/>           |
| Heart failure services/ supports                                                                   | <input type="checkbox"/> | <input type="checkbox"/>        | <input type="checkbox"/>                              | <input type="checkbox"/>           |
| Injury prevention and promotion and education                                                      | <input type="checkbox"/> | <input type="checkbox"/>        | <input type="checkbox"/>                              | <input type="checkbox"/>           |
| Obesity management clinics/ services                                                               | <input type="checkbox"/> | <input type="checkbox"/>        | <input type="checkbox"/>                              | <input type="checkbox"/>           |
| Physical activity promotion and education                                                          | <input type="checkbox"/> | <input type="checkbox"/>        | <input type="checkbox"/>                              | <input type="checkbox"/>           |
| Tobacco cessation promotion and education                                                          | <input type="checkbox"/> | <input type="checkbox"/>        | <input type="checkbox"/>                              | <input type="checkbox"/>           |
| Other (please specify type of service delivery - telehealth, visiting staff, or on-site staff)     |                          |                                 |                                                       |                                    |

Site Services

14. What types of targeted, disease-specific chronic disease prevention and management programming does your site offer?

|                                  | no programming           | unsure if programming is offered | programming delivered by visiting health care provider(s) | programming delivered by on-site staff |
|----------------------------------|--------------------------|----------------------------------|-----------------------------------------------------------|----------------------------------------|
| Arthritis                        | <input type="checkbox"/> | <input type="checkbox"/>         | <input type="checkbox"/>                                  | <input type="checkbox"/>               |
| Asthma                           | <input type="checkbox"/> | <input type="checkbox"/>         | <input type="checkbox"/>                                  | <input type="checkbox"/>               |
| Autism                           | <input type="checkbox"/> | <input type="checkbox"/>         | <input type="checkbox"/>                                  | <input type="checkbox"/>               |
| Cancer                           | <input type="checkbox"/> | <input type="checkbox"/>         | <input type="checkbox"/>                                  | <input type="checkbox"/>               |
| Cardiac Rehab                    | <input type="checkbox"/> | <input type="checkbox"/>         | <input type="checkbox"/>                                  | <input type="checkbox"/>               |
| Cardiovascular Disease           | <input type="checkbox"/> | <input type="checkbox"/>         | <input type="checkbox"/>                                  | <input type="checkbox"/>               |
| Crohn's/ Colitis                 | <input type="checkbox"/> | <input type="checkbox"/>         | <input type="checkbox"/>                                  | <input type="checkbox"/>               |
| Chronic Pain                     | <input type="checkbox"/> | <input type="checkbox"/>         | <input type="checkbox"/>                                  | <input type="checkbox"/>               |
| Congestive Heart Failure         | <input type="checkbox"/> | <input type="checkbox"/>         | <input type="checkbox"/>                                  | <input type="checkbox"/>               |
| COPD                             | <input type="checkbox"/> | <input type="checkbox"/>         | <input type="checkbox"/>                                  | <input type="checkbox"/>               |
| Cystic Fibrosis                  | <input type="checkbox"/> | <input type="checkbox"/>         | <input type="checkbox"/>                                  | <input type="checkbox"/>               |
| Developmental Delay              | <input type="checkbox"/> | <input type="checkbox"/>         | <input type="checkbox"/>                                  | <input type="checkbox"/>               |
| Diabetes                         | <input type="checkbox"/> | <input type="checkbox"/>         | <input type="checkbox"/>                                  | <input type="checkbox"/>               |
| Eating Disorders                 | <input type="checkbox"/> | <input type="checkbox"/>         | <input type="checkbox"/>                                  | <input type="checkbox"/>               |
| Epilepsy                         | <input type="checkbox"/> | <input type="checkbox"/>         | <input type="checkbox"/>                                  | <input type="checkbox"/>               |
| Hemophilia or Bleeding Disorders | <input type="checkbox"/> | <input type="checkbox"/>         | <input type="checkbox"/>                                  | <input type="checkbox"/>               |
| HIV                              | <input type="checkbox"/> | <input type="checkbox"/>         | <input type="checkbox"/>                                  | <input type="checkbox"/>               |
| Hypertension                     | <input type="checkbox"/> | <input type="checkbox"/>         | <input type="checkbox"/>                                  | <input type="checkbox"/>               |
| Kidney Disease                   | <input type="checkbox"/> | <input type="checkbox"/>         | <input type="checkbox"/>                                  | <input type="checkbox"/>               |
| Pulmonary Rehab                  | <input type="checkbox"/> | <input type="checkbox"/>         | <input type="checkbox"/>                                  | <input type="checkbox"/>               |
| Stroke                           | <input type="checkbox"/> | <input type="checkbox"/>         | <input type="checkbox"/>                                  | <input type="checkbox"/>               |

Other (please specify programming and area and how programming is delivered - i.e. by visiting health care providers or on-site health care providers)

[Empty text box for other programming details]



1  
2  
3  
4  
5  
6  
7  
8  
9  
10  
11  
12  
13  
14  
15  
16  
17  
18  
19  
20  
21  
22  
23  
24  
25  
26  
27  
28  
29  
30  
31  
32  
33  
34  
35  
36  
37  
38  
39  
40  
41  
42  
43  
44  
45  
46  
47  
48  
49  
50  
51  
52  
53  
54  
55  
56  
57  
58  
59  
60

## Team-Based Care

**This section is designed to capture information on the types of clinical team-based care offered at your site.**

15. Does your site offer formalized, multidisciplinary, collaborative team-based care in any area(s) (e.g. diabetes teams, cancer care teams, etc.)?

Yes

No

Confidential

1  
2  
3  
4  
5  
6  
7  
8  
9  
10  
11  
12  
13  
14  
15  
16  
17  
18  
19  
20  
21  
22  
23  
24  
25  
26  
27  
28  
29  
30  
31  
32  
33  
34  
35  
36  
37  
38  
39  
40  
41  
42  
43  
44  
45  
46  
47  
48  
49  
50  
51  
52  
53  
54  
55  
56  
57  
58  
59  
60

### Primary Health Care Teams

**This page is designed to gather additional information on the formalized, multidisciplinary, collaborative primary health care teams operating at your site. In the spaces provided below, for each team, please indicate the team focus, the number and types of on-site RHA providers on the team, the number and types of off-site RHA providers on the team, and the number and types of non-RHA providers on the team.**

15a.

Team Focus:

RHA providers ON-SITE  
(numbers and formal position titles):

RHA providers OFF-SITE  
(including those accessed through telehealth; numbers and formal position titles):

Non-RHA providers  
(numbers, formal position titles, and organization/ organizational affiliation)

15b.

Team Focus:

RHA providers ON-SITE  
(numbers and formal position titles):

RHA providers OFF-SITE  
(including those accessed through telehealth; numbers and formal position titles):

Non-RHA providers  
(numbers, formal position titles, and organization/ organizational affiliation)

15c.

Team Focus:

RHA providers ON-SITE  
(numbers and formal  
position titles):

RHA providers OFF-SITE  
(including those accessed  
through telehealth;  
numbers and formal  
position titles):

Non-RHA providers  
(numbers, formal position  
titles, and organization/  
organizational affiliation)

15d.

Team Focus:

RHA providers ON-SITE  
(numbers and formal  
position titles):

RHA providers OFF-SITE  
(including those accessed  
through telehealth;  
numbers and formal  
position titles):

Non-RHA providers  
(numbers, formal position  
titles, and organization/  
organizational affiliation)

15e.

Team Focus:

RHA providers ON-SITE  
(numbers and formal  
position titles):

RHA providers OFF-SITE  
(including those accessed  
through telehealth;  
numbers and formal  
position titles):

Non-RHA providers  
(numbers, formal position  
titles, and organization/  
organizational affiliation)

1  
2  
3  
4  
5  
6  
7  
8  
9  
10  
11  
12  
13  
14  
15  
16  
17  
18  
19  
20  
21  
22  
23  
24  
25  
26  
27  
28  
29  
30  
31  
32  
33  
34  
35  
36  
37  
38  
39  
40  
41  
42  
43  
44  
45  
46  
47  
48  
49  
50  
51  
52  
53  
54  
55  
56  
57  
58  
59  
60

Enter information for additional teams?

- Yes
- No

Confidential

**Additional Teams**

15f.

Team Focus:

RHA providers ON-SITE  
(numbers and formal  
position titles):

RHA providers OFF-SITE  
(including those accessed  
through telehealth;  
numbers and formal  
position titles):

Non-RHA providers  
(numbers, formal position  
titles, and organization/  
organizational affiliation)

15g.

Team Focus:

RHA providers ON-SITE  
(numbers and formal  
position titles):

RHA providers OFF-SITE  
(including those accessed  
through telehealth;  
numbers and formal  
position titles):

Non-RHA providers  
(numbers, formal position  
titles, and organization/  
organizational affiliation)

1  
2  
3  
4  
5  
6  
7  
8  
9  
10  
11  
12  
13  
14  
15  
16  
17  
18  
19  
20  
21  
22  
23  
24  
25  
26  
27  
28  
29  
30  
31  
32  
33  
34  
35  
36  
37  
38  
39  
40  
41  
42  
43  
44  
45  
46  
47  
48  
49  
50  
51  
52  
53  
54  
55  
56  
57  
58  
59  
60

15h.

Team Focus:

RHA providers ON-SITE  
(numbers and formal  
position titles):

RHA providers OFF-SITE  
(including those accessed  
through telehealth;  
numbers and formal  
position titles):

Non-RHA providers  
(numbers, formal position  
titles, and organization/  
organizational affiliation)

15i.

Team Focus:

RHA providers ON-SITE  
(numbers and formal  
position titles):

RHA providers OFF-SITE  
(including those accessed  
through telehealth;  
numbers and formal  
position titles):

Non-RHA providers  
(numbers, formal position  
titles, and organization/  
organizational affiliation)

15j.

Team Focus:

RHA providers ON-SITE  
(numbers and formal  
position titles):

RHA providers OFF-SITE  
(including those accessed  
through telehealth;  
numbers and formal  
position titles):

Non-RHA providers  
(numbers, formal position  
titles, and organization/  
organizational affiliation)

15k.

Team Focus:

RHA providers ON-SITE  
(numbers and formal  
position titles):

RHA providers OFF-SITE  
(including those accessed  
through telehealth;  
numbers and formal  
position titles):

Non-RHA providers  
(numbers, formal position  
titles, and organization/  
organizational affiliation)

15l.

Team Focus:

RHA providers ON-SITE  
(numbers and formal  
position titles):

RHA providers OFF-SITE  
(including those accessed  
through telehealth;  
numbers and formal  
position titles):

Non-RHA providers  
(numbers, formal position  
titles, and organization/  
organizational affiliation)

15m.

Team Focus:

RHA providers ON-SITE  
(numbers and formal  
position titles):

RHA providers OFF-SITE  
(including those accessed  
through telehealth;  
numbers and formal  
position titles):

Non-RHA providers  
(numbers, formal position  
titles, and organization/  
organizational affiliation)

1  
2  
3  
4  
5  
6  
7  
8  
9  
10  
11  
12  
13  
14  
15  
16  
17  
18  
19  
20  
21  
22  
23  
24  
25  
26  
27  
28  
29  
30  
31  
32  
33  
34  
35  
36  
37  
38  
39  
40  
41  
42  
43  
44  
45  
46  
47  
48  
49  
50  
51  
52  
53  
54  
55  
56  
57  
58  
59  
60

15n.

Team Focus:

RHA providers ON-SITE  
(numbers and formal  
position titles):

RHA providers OFF-SITE  
(including those accessed  
through telehealth;  
numbers and formal  
position titles):

Non-RHA providers  
(numbers, formal position  
titles, and organization/  
organizational affiliation)

15o.

Team Focus:

RHA providers ON-SITE  
(numbers and formal  
position titles):

RHA providers OFF-SITE  
(including those accessed  
through telehealth;  
numbers and formal  
position titles):

Non-RHA providers  
(numbers, formal position  
titles, and organization/  
organizational affiliation)



Collaboration in Patient Care

**This next series of questions is designed to gather information on types of collaboration that occur at your primary health care site.**

16. Does your site provide space to non-RHA service providers to deliver primary health care services?  
(This question does not include services offered through telehealth.)

- Yes
- No

Confidential

### Collaboration in Patient Care

**This page is designed to gather additional information on the non-RHA providers providing primary care and/or primary health care services at your site. The question below is not intended to capture information on specialists, except for psychiatrists.**

16a. Please indicate the number and types of non-RHA service providers who provide primary health care at your site, the type of service provided, and the method of service provision.

|     | Type of service provider | Number of Service providers | Method of service provision | RHA provides support staff? |
|-----|--------------------------|-----------------------------|-----------------------------|-----------------------------|
| 1.  | <input type="text"/>     | <input type="text"/>        | <input type="text"/>        | <input type="text"/>        |
| 2.  | <input type="text"/>     | <input type="text"/>        | <input type="text"/>        | <input type="text"/>        |
| 3.  | <input type="text"/>     | <input type="text"/>        | <input type="text"/>        | <input type="text"/>        |
| 4.  | <input type="text"/>     | <input type="text"/>        | <input type="text"/>        | <input type="text"/>        |
| 5.  | <input type="text"/>     | <input type="text"/>        | <input type="text"/>        | <input type="text"/>        |
| 6.  | <input type="text"/>     | <input type="text"/>        | <input type="text"/>        | <input type="text"/>        |
| 7.  | <input type="text"/>     | <input type="text"/>        | <input type="text"/>        | <input type="text"/>        |
| 8.  | <input type="text"/>     | <input type="text"/>        | <input type="text"/>        | <input type="text"/>        |
| 9.  | <input type="text"/>     | <input type="text"/>        | <input type="text"/>        | <input type="text"/>        |
| 10. | <input type="text"/>     | <input type="text"/>        | <input type="text"/>        | <input type="text"/>        |
| 11. | <input type="text"/>     | <input type="text"/>        | <input type="text"/>        | <input type="text"/>        |
| 12. | <input type="text"/>     | <input type="text"/>        | <input type="text"/>        | <input type="text"/>        |
| 13. | <input type="text"/>     | <input type="text"/>        | <input type="text"/>        | <input type="text"/>        |
| 14. | <input type="text"/>     | <input type="text"/>        | <input type="text"/>        | <input type="text"/>        |
| 15. | <input type="text"/>     | <input type="text"/>        | <input type="text"/>        | <input type="text"/>        |

Others (please specify numbers, methods of service provision, and whether or not RHA provides support staff). Please separate entries, if necessary, with a semi-colon.

## Collaboration in Patient Care

This section is designed to capture information on the degree and types of collaboration that take place at your site among RHA primary health care providers at your site, between RHA primary health care providers at your site and RHA primary health care providers at other sites, and between RHA primary health care providers at your site and non-RHA primary health care providers.

17. To what degree do primary health care providers at your site typically consult and/or collaborate in patient care with the following types of primary health care providers:

|                                          | Never                 | Sometimes             | Frequently            | Don't Know            |
|------------------------------------------|-----------------------|-----------------------|-----------------------|-----------------------|
| Other RHA providers at your site         | <input type="radio"/> | <input type="radio"/> | <input type="radio"/> | <input type="radio"/> |
| Providers within your RHA at other sites | <input type="radio"/> | <input type="radio"/> | <input type="radio"/> | <input type="radio"/> |
| Providers from other RHAs                | <input type="radio"/> | <input type="radio"/> | <input type="radio"/> | <input type="radio"/> |
| Non-RHA providers at your site           | <input type="radio"/> | <input type="radio"/> | <input type="radio"/> | <input type="radio"/> |
| Non-RHA providers at other sites         | <input type="radio"/> | <input type="radio"/> | <input type="radio"/> | <input type="radio"/> |

18. To what degree do RHA primary health care providers at your site use the following methods to communicate/collaborate/consult about patient care with other RHA primary health care providers on-site?

|                                | Never                 | Sometimes             | Frequently            | Don't Know            |
|--------------------------------|-----------------------|-----------------------|-----------------------|-----------------------|
| Telephone                      | <input type="radio"/> | <input type="radio"/> | <input type="radio"/> | <input type="radio"/> |
| Face to face meetings          | <input type="radio"/> | <input type="radio"/> | <input type="radio"/> | <input type="radio"/> |
| EHR                            | <input type="radio"/> | <input type="radio"/> | <input type="radio"/> | <input type="radio"/> |
| Hard copy/ paper documentation | <input type="radio"/> | <input type="radio"/> | <input type="radio"/> | <input type="radio"/> |

1 19. To what degree do RHA primary health care providers at your site use the following methods to  
 2 communicate/collaborate/consult about patient care with other RHA primary health care providers located  
 3 off-site (including primary health care providers from other RHAs)?  
 4

|    | Never                 | Sometimes             | Frequently            | Don't Know            |
|----|-----------------------|-----------------------|-----------------------|-----------------------|
| 5  |                       |                       |                       |                       |
| 6  |                       |                       |                       |                       |
| 7  | <input type="radio"/> | <input type="radio"/> | <input type="radio"/> | <input type="radio"/> |
| 8  |                       |                       |                       |                       |
| 9  | <input type="radio"/> | <input type="radio"/> | <input type="radio"/> | <input type="radio"/> |
| 10 |                       |                       |                       |                       |
| 11 | <input type="radio"/> | <input type="radio"/> | <input type="radio"/> | <input type="radio"/> |
| 12 |                       |                       |                       |                       |
| 13 | <input type="radio"/> | <input type="radio"/> | <input type="radio"/> | <input type="radio"/> |
| 14 |                       |                       |                       |                       |
| 15 | <input type="radio"/> | <input type="radio"/> | <input type="radio"/> | <input type="radio"/> |
| 16 |                       |                       |                       |                       |

17  
 18 20. To what degree do RHA primary health care providers at your site use the following methods to  
 19 communicate/collaborate/consult about patient care with non-RHA primary health care providers?  
 20

|    | Never                 | Sometimes             | Frequently            | Don't Know            |
|----|-----------------------|-----------------------|-----------------------|-----------------------|
| 21 |                       |                       |                       |                       |
| 22 |                       |                       |                       |                       |
| 23 | <input type="radio"/> | <input type="radio"/> | <input type="radio"/> | <input type="radio"/> |
| 24 |                       |                       |                       |                       |
| 25 | <input type="radio"/> | <input type="radio"/> | <input type="radio"/> | <input type="radio"/> |
| 26 |                       |                       |                       |                       |
| 27 | <input type="radio"/> | <input type="radio"/> | <input type="radio"/> | <input type="radio"/> |
| 28 |                       |                       |                       |                       |
| 29 | <input type="radio"/> | <input type="radio"/> | <input type="radio"/> | <input type="radio"/> |
| 30 |                       |                       |                       |                       |
| 31 | <input type="radio"/> | <input type="radio"/> | <input type="radio"/> | <input type="radio"/> |
| 32 |                       |                       |                       |                       |

33  
 34  
 35  
 36  
 37  
 38  
 39  
 40  
 41  
 42  
 43  
 44  
 45  
 46  
 47  
 48  
 49  
 50  
 51  
 52  
 53  
 54  
 55  
 56  
 57  
 58  
 59  
 60

RHA/non-RHA Collaboration

21. The two types of RHA/ non-RHA collaboration this survey has included questions about are: a) instances where non-RHA primary health care providers deliver services in RHA facilities (Question 16); and b) instances where RHA primary health care providers consult/collaborate/communicate with non-RHA providers in patient care (Questions 17 and 20).

Are there other ways that RHA providers collaborate with non-RHA providers that we have not included questions about in this survey? If so, please briefly describe. Responses to this question will be used to assist the development of focus group questions designed to learn more about RHA/ non-RHA collaboration in primary health care.

Confidential

1  
2  
3  
4  
5  
6  
7  
8  
9  
10  
11  
12  
13  
14  
15  
16  
17  
18  
19  
20  
21  
22  
23  
24  
25  
26  
27  
28  
29  
30  
31  
32  
33  
34  
35  
36  
37  
38  
39  
40  
41  
42  
43  
44  
45  
46  
47  
48  
49  
50  
51  
52  
53  
54  
55  
56  
57  
58  
59  
60

Thank You

**Thank you for taking the time to gather information for and complete this survey.**

Do you have any additional comments to add regarding the organization and delivery of primary health care services at your site?

Please enter your name, phone number, and email address, so that we may contact you for clarification of answers, if necessary.

Name:

Phone number:

Email:

Confidential

Appendix 2. Types of targeted, disease-specific chronic disease prevention and management programming delivered at PHC site by urban/rural status, n (%).

|                           | Arthritis<br>n=139                   | Asthma<br>n=139       | Autism<br>n=138          | Cancer<br>n=137          | Cardiac Rehab<br>n=138 | CVD<br>n=139              | Crohn's/<br>Colitis<br>n=136 | Chronic<br>Pain<br>n=139       |
|---------------------------|--------------------------------------|-----------------------|--------------------------|--------------------------|------------------------|---------------------------|------------------------------|--------------------------------|
| Delivered                 | 20 (14.4)                            | 23 (16.5)             | 37 (26.8)                | 31 (22.6)                | 24 (17.4)              | 30 (21.6)                 | 19 (14.0)                    | 26 (18.7)                      |
| Urban                     | 5 (15.2)                             | 8 (24.2)              | 6 (18.2)                 | 8 (25.0)                 | 5 (15.6)               | 8 (24.2)                  | 6 (18.8)                     | 8 (24.2)                       |
| Rural                     | 15 (14.2)                            | 15 (14.2)             | 31 (29.5)                | 23 (21.9)                | 19 (17.9)              | 22 (20.8)                 | 13 (12.5)                    | 18 (17.0)                      |
| Delivered by visiting HCP | 4 (20.0)                             | 5 (21.7)              | 16 (43.2)                | 7 (22.6)                 | 3 (12.5)               | 5 (16.7)                  | 3 (15.8)                     | 5 (19.2)                       |
| Urban                     | 0 (0.0)                              | 1 (12.5)              | 2 (33.3)                 | 1 (12.5)                 | 0 (0.0)                | 0 (0.0)                   | 0 (0.0)                      | 1 (12.5)                       |
| Rural                     | 4 (26.7)                             | 4 (26.7)              | 14 (45.2)                | 6 (26.1)                 | 3 (15.8)               | 5 (22.7)                  | 3 (23.1)                     | 4 (22.2)                       |
| On-site delivery          | 17 (85.0)                            | 19 (82.6)             | 24 (64.9)                | 27 (87.1)                | 22 (91.7)              | 26 (86.7)                 | 16 (84.2)                    | 22 (84.6)                      |
| Urban                     | 5 (100.0)                            | 7 (87.5)              | 5 (83.3)                 | 7 (87.5)                 | 5 (100.0)              | 8 (100.0)                 | 6 (100.0)                    | 7 (87.5)                       |
| Rural                     | 12 (80.0)                            | 12 (80.0)             | 19 (61.3)                | 20 (87.0)                | 17 (89.5)              | 18 (81.8)                 | 10 (76.9)                    | 15 (83.3)                      |
| Unsure                    | 4 (2.9)                              | 3 (2.2)               | 5 (3.6)                  | 2 (1.5)                  | 5 (3.6)                | 3 (2.2)                   | 3 (2.2)                      | 2 (1.4)                        |
|                           | Congestive Heart<br>Failure<br>n=139 | COPD<br>n=139         | Cystic Fibrosis<br>n=136 | Dev. Delay<br>n=134      | Diabetes<br>n=138      | Eating Disorders<br>n=136 | Epilepsy<br>n=137            | Bleeding<br>Disorders<br>n=137 |
| Delivered                 | 31 (22.3)                            | 33 (23.7)             | 12 (8.8)                 | 29 (21.6)                | 63 (45.7)              | 27 (19.9)                 | 17 (12.4)                    | 14 (10.2)                      |
| Urban                     | 7 (21.9)                             | 7 (21.9)              | 5 (15.6)                 | 5 (16.1)                 | 13 (40.6)              | 6 (19.4)                  | 5 (15.6)                     | 3 (9.4)                        |
| Rural                     | 24 (22.4)                            | 26 (24.3)             | 7 (6.7)                  | 24 (23.3)                | 50 (47.2)              | 21 (20.0)                 | 12 (11.4)                    | 11 (10.5)                      |
| Delivered by visiting HCP | 7 (22.6)                             | 7 (21.2)              | 2 (16.7)                 | 12 (41.4)                | 18 (28.6)              | 4 (14.8)                  | 4 (23.5)                     | 6 (42.9)                       |
| Urban                     | 0 (0.0)                              | 0 (0.0)               | 0 (0.0)                  | 1 (20.0)                 | 4 (30.8)               | 0 (0.0)                   | 1 (20.0)                     | 1 (33.3)                       |
| Rural                     | 7 (29.2)                             | 7 (26.9)              | 2 (28.6)                 | 11 (45.8)                | 14 (28.0)              | 4 (19.0)                  | 3 (25.0)                     | 5 (45.5)                       |
| On-site delivery          | 26 (83.9)                            | 27 (81.8)             | 10 (83.3)                | 18 (62.1)                | 53 (84.1)              | 23 (85.2)                 | 14 (82.3)                    | 8 (57.1)                       |
| Urban                     | 7 (100.0)                            | 7 (100.0)             | 5 (100.0)                | 4 (80.0)                 | 9 (69.2)               | 6 (100.0)                 | 4 (80.0)                     | 2 (66.7)                       |
| Rural                     | 19 (79.2)                            | 20 (76.9)             | 5 (71.4)                 | 14 (58.3)                | 44 (88.0)              | 17 (81.0)                 | 10 (83.3)                    | 6 (54.5)                       |
| Unsure                    | 1 (0.7)                              | 1 (0.7)               | 4 (2.9)                  | 6 (4.5)                  | 2 (1.4)                | 3 (2.2)                   | 4 (2.9)                      | 5 (3.6)                        |
|                           | HIV<br>n=137                         | Hypertension<br>n=136 | Kidney Disease<br>n=136  | Pulmonary Rehab<br>n=137 | Stroke<br>n=137        |                           |                              |                                |
| Delivered                 | 21 (15.3)                            | 34 (25.0)             | 26 (19.1)                | 15 (10.9)                | 24 (17.5)              |                           |                              |                                |
| Urban                     | 8 (25.0)                             | 8 (25.8)              | 6 (18.8)                 | 6 (18.8)                 | 7 (21.9)               |                           |                              |                                |
| Rural                     | 13 (12.4)                            | 26 (24.8)             | 20 (19.2)                | 9 (8.6)                  | 17 (16.2)              |                           |                              |                                |
| Delivered by visiting HCP | 7 (33.3)                             | 8 (23.5)              | 10 (38.5)                | 4 (26.7)                 | 3 (12.5)               |                           |                              |                                |
| Urban                     | 2 (25.0)                             | 2 (25.0)              | 1 (16.7)                 | 1 (16.7)                 | 0 (0.0)                |                           |                              |                                |
| Rural                     | 5 (38.5)                             | 6 (23.1)              | 9 (45.0)                 | 3 (33.3)                 | 3 (17.6)               |                           |                              |                                |
| On-site delivery          | 16 (76.2)                            | 28 (82.4)             | 19 (73.1)                | 13 (86.7)                | 22 (91.7)              |                           |                              |                                |
| Urban                     | 6 (75.0)                             | 6 (75.0)              | 5 (83.3)                 | 5 (83.3)                 | 7 (100.0)              |                           |                              |                                |
| Rural                     | 10 (76.9)                            | 22 (84.6)             | 14 (70.0)                | 8 (88.9)                 | 15 (88.2)              |                           |                              |                                |
| Unsure                    | 5 (3.6)                              | 2 (1.5)               | 2 (1.5)                  | 3 (2.2)                  | 2 (1.5)                |                           |                              |                                |

\* p ≤ .05
